# Supplementary material for: Use of Proton-Pump Inhibitors Predicts Heart Failure and Death in Patients with Coronary Artery Disease
Source: PLoS One. 2017 Jan 19;12(1):e0169826. doi: 10.1371/journal.pone.0169826 (PMC5245803; doi:10.1371/journal.pone.0169826)
Supplement: S1 File — (XLSX) [file pone.0169826.s001.xlsx]

## Sheet: Database%20PPIs21.xls
hospital	n_pac	pacient	Age	sexmatch	Caucasian	BMI	Diabetes	Smoking	HTA1yesno	Peripheral artery disease	ACVPREV1	CABGPREVaV1	Atrial fibrilation	moderate to severe left ventricular dysfunction	IBP	Aspirin	CLOPIDOGREL	ACENOCUMAROL	STATINS	ACEI	ARB	BETABLOCKERS	NITRATES	DIURETICS	LastACS	NUMBER OF VESSELS DISEASE	COMPLETE REVASCULARIZATION	DRUG ELUTING STENT	PCI	CABG	TiporevasctrasEVV1_6	ColesterolFJD	HDLFJD	TGFJD	LDLFJD	CKD_EPI	PCRHSFJD	Acuteischemicevents	Timetoacuteischemicevent	AcuteischemiceventHForDeath	TimetoacuteischemiceventHForDeath	HForDeath	TimetoHForDeath	TimetoDeatorFinalVisit	CVdeath	Death	CauseofDeath	CreatininaFJD	OMEPRAZOL
1	1	11	67	1	1	28.125	0	0	1	0	0	0	1	0	1	1	0	0	1	1	0	0	0	1	2	1	1	0	1	0	2	140	39	130	75	88.0681	6.093	0	1414	0	1414	0	1414	1414	0	0		0.9	1
1	2	12	40	1	1	23.4568	1	0	1	0	0	0	0	0	1	1	0	0	1	1	0	1	0	0	2	2	0	1	1	0	1	166	44	196	83	106.461	11.315	0	1583	0	1583	0	1583	1583	0	0		0.9	1
1	3	13	63	1	1	24.6094	1	0	1	0	0	0	0	0	0	1	1	0	1	0	0	1	0	0	2	1	1	1	1	0	1	104	33	174	36	58.0689	1.008	0	1582	0	1582	0	1582	1582	0	0		1.3	0
1	4	14	83	1	1	#NULL!	0	0	1	0	0	0	0	1	1	1	1	0	0	1	0	0	0	1	1	2	0	0	1	0	0	172	42	155	99	69.2925	4.194	1	852	1	852	1	1384	1384	2	1	intestinal ischemia	1	1
1	6	16	79	1	1	30.0215	0	0	1	0	0	0	0	0	1	1	0	0	1	1	0	1	0	1	2	1	1	0	1	0	0	166	42	129	98	80.9487	2.759	0	1582	0	1582	0	1582	1582	0	0		0.9	1
2	1	21	63	1	1	27.7344	0	0	1	1	0	0	0	1	1	1	1	0	1	0	0	1	0	1	2	1	1	0	0	0	0	100	25	116	52	25.1188	40.673	0	26	1	26	1	26	26	1	1	HEART FAILURE	2.6	1
2	2	22	60	1	1	28.0992	0	0	1	0	0	0	0	0	1	1	1	0	1	1	0	1	0	0	1	0	1	0	0	0	4	142	37	50	95	72.5787	8.125	0	1167	0	1167	0	1167	1167	0	0		1.1	1
2	3	23	67	1	1	29.7143	0	0	0	0	0	0	0	0	0	1	1	0	1	1	0	1	0	0	2	1	1	0	1	0	0	138	53	67	72	62.1968	0.5	0	1175	0	1175	0	1175	1175	0	0		1.2	0
2	4	24	65	1	1	25.7778	1	0	1	0	0	0	0	0	0	1	0	0	1	1	0	0	0	0	2	2	0	0	0	1	3	165	47	144	89	63.0768	3.395	0	1174	0	1174	0	1174	1174	0	0		1.2	0
2	8	28	64	1	1	26.9531	1	0	1	0	0	0	0	0	0	1	1	0	1	1	0	1	0	1	2	1	1	1	1	0	1	141	42	163	66	89.9438	2.896	0	1170	0	1170	0	1170	1170	0	0		0.9	0
2	9	29	60	1	1	31.1419	1	0	1	0	0	0	0	0	0	1	1	0	1	1	0	1	0	0	1	3	0	0	0	0	4	141	40	96	82	97.0952	6.866	0	1175	0	1175	0	1175	1175	0	0		0.8	0
3	1	31	54	1	1	25.0762	0	0	0	0	0	0	0	0	0	1	1	0	1	1	0	1	0	0	2	3	0	1	1	0	1	173	41	75	117	84.9489	0.647	0	1267	0	1267	0	1267	1267	0	0		1	0
3	2	32	74	1	1	22.5306	0	0	0	0	0	0	0	1	0	1	1	0	1	1	0	1	0	0	2	1	1	1	1	0	1	169	47	87	105	59.2124	2.908	0	1268	0	1268	0	1268	1268	0	0		1.2	0
3	3	33	56	1	1	27.31	0	0	0	0	0	0	1	0	1	1	1	0	1	0	0	1	0	0	1	1	1	0	1	0	0	146	41	105	84	67.1933	2.017	1	300	1	300	0	1269	1269	0	0		1.2	1
3	4	34	84	1	1	30.2734	1	0	1	0	0	0	0	0	1	1	1	0	1	0	0	1	1	1	1	2	0	0	1	0	0	139	34	78	89	50.1046	3.036	0	1243	0	1243	0	1243	1243	0	0		1.3	1
3	5	35	48	1	1	28.0624	1	0	0	0	0	0	0	0	1	1	1	0	1	0	0	1	1	0	1	3	0	1	1	0	1	134	27	137	80	118.893	0.622	1	71	1	71	0	1229	1229	0	0		0.6	1
3	6	36	73	0	1	21.3333	0	0	0	0	1	0	0	0	1	0	1	0	1	1	0	1	0	0	2	#NULL!		0	0	0	4	203	59	95	125	63.6359	2.885	0	1236	0	1236	0	1236	1236	0	0		0.9	1
3	7	37	43	1	1	28.2247	0	0	0	0	0	0	0	0	0	1	1	0	1	1	0	1	0	0	1	1	1	1	1	0	1	122	29	105	72	91.7732	2.179	0	1427	0	1427	0	1427	1427	0	0		1	0
3	9	39	45	1	1	24.8457	0	0	0	0	0	0	0	0	1	1	0	0	1	1	0	1	0	0	1	2	0	1	1	0	1	180	41	89	121	80.6438	12.794	0	1417	0	1417	0	1417	1417	0	0		1.1	1
4	1	41	74	1	1	30.6425	1	0	1	0	1	0	0	1	1	1	1	0	1	0	1	1	0	0	1	1	1	1	1	0	1	166	40	190	88	49.1444	22.019	0	1212	1	762	1	762	1212	0	0		1.4	1
4	3	43	64	1	1	29.4922	1	0	1	0	0	0	0	0	1	1	1	0	1	1	0	1	0	0	1	3	0	1	1	0	1	179	54	194	86	79.1863	0.82	0	1582	0	1582	0	1582	1582	0	0		1	1
4	4	44	80	0	1	28.7201	0	0	0	0	0	0	0	0	1	1	1	0	1	0	0	0	0	0	1	0	1	0	0	0	4	168	66	70	88	69.8538	0.68	0	1225	0	1225	0	1225	1225	0	0		0.8	1
4	5	45	50	1	1	28.7344	0	0	1	0	0	0	0	0	1	1	1	0	1	0	1	1	0	0	1	2	0	1	1	0	1	180	32	134	121	87.3697	3.033	0	1270	0	1270	0	1270	1270	0	0		1	1
4	6	46	80	0	1	25.8065	0	0	1	0	0	0	0	0	1	1	1	0	1	1	0	0	0	0	1	0	1	0	1	0	0	233	65	87	151	42.7854	3.56	0	1237	0	1237	0	1237	1237	0	0		1.2	1
4	7	47	87	1	1	27.5391	0	0	0	0	0	0	0	0	1	0	1	1	1	1	0	0	1	0	2	2	0	1	1	0	1	166	41	165	92	67.3725	2.248	0	1213	0	1213	0	1213	1213	0	0		1	1
4	8	48	86	1	1	23.1473	0	0	1	0	0	0	0	0	1	1	1	0	1	1	0	1	0	0	2	2	0	1	1	0	1	121	29	221	48	26.1544	3.872	1	631	1	478	1	478	873	2	1	Constitutional syndrome no studied	2.2	1
4	9	49	59	0	1	27.6795	0	0	1	0	1	0	0	1	1	1	1	0	1	1	0	1	0	1	2	2	0	1	1	0	1	146	51	72	81	80.9573	2.368	0	1225	0	1225	0	1225	1225	0	0		0.8	1
1	10	110	63	1	1	#NULL!	1	0	1	0	0	0	0	0	1	1	1	0	1	0	1	1	0	0	1	2	0	1	1	0	1	177	35	188	104	63.9692	0.61	0	1162	0	1162	0	1162	1162	0	0		1.2	1
1	12	112	69	1	1	33.2671	0	0	1	0	0	0	0	0	1	1	1	0	1	0	0	1	0	0	1	3	0	1	1	0	1	134	34	217	57	43.3127	9.546	0	1450	0	1450	0	1450	1450	0	0		1.6	1
1	13	113	51	1	1	28.2284	0	0	0	0	0	0	0	0	0	0	0	0	1	0	0	0	1	0	1	0	1	0	0	0	4	239	40	632	73	86.7581	1.206	0	1189	0	1189	0	1189	1189	0	0		1	0
1	14	114	82	1	1	25.6055	1	0	1	0	0	0	0	0	0	1	1	0	0	1	0	1	1	0	1	3	0	0	0	0	4	105	35	102	50	46.4588	0.618	0	1165	0	1165	0	1165	1165	0	0		1.4	0
1	15	115	64	1	1	28.089	0	0	0	0	0	0	0	1	1	1	1	0	1	1	0	1	0	0	2	1	1	1	1	0	1	132	37	104	74	70.5678	1.706	0	1251	0	1251	0	1251	1251	0	0		1.1	1
1	19	119	72	1	1	27.5556	0	0	0	0	0	0	0	1	1	1	0	0	1	1	0	0	1	0	1	1	0	0	0	0	4	135	46	100	69	74.859	1.515	0	1191	0	1191	0	1191	1191	0	0		1	1
1	20	120	72	1	1	25.9909	0	0	1	0	0	0	0	0	1	1	1	0	1	1	0	0	0	0	2	1	0	0	1	0	0	126	44	78	66	54.5113	1.314	0	1185	0	1185	0	1185	1185	0	0		1.3	1
1	21	121	65	1	1	33.5146	0	0	1	0	0	0	0	0	1	1	1	0	1	1	0	1	0	0	2	2	0	1	1	0	1	134	44	138	62	70.0738	1.105	0	1047	0	1047	0	1047	1047	0	0		1.1	1
1	22	122	67	1	1	30.478	0	0	1	0	0	0	0	0	1	1	1	0	1	0	0	1	0	0	2	3	0	1	1	0	1	158	40	126	93	88.0681	0.974	0	1105	0	1105	0	1105	1105	0	0		0.9	1
1	23	123	58	1	1	23.6614	0	0	1	0	0	0	0	0	1	1	1	0	1	0	0	1	0	0	1	2	1	1	1	0	1	119	36	114	60	82.5952	0.625	0	1279	0	1279	0	1279	1279	0	0		1	1
1	25	125	63	1	1	31.0204	0	0	0	0	0	0	0	0	1	1	1	0	1	1	0	1	0	0	2	2	1	1	1	0	1	126	38	71	74	79.7445	0.737	0	966	0	966	0	966	966	0	0		1	1
1	26	126	79	0	1	26.9531	0	0	1	0	0	0	0	0	1	0	1	0	1	1	0	1	0	0	1	0	1	0	0	0	4	183	65	158	86	53.7127	4.529	0	1160	0	1160	0	1160	1160	0	0		1	1
1	27	127	75	1	1	29.3878	1	0	1	0	0	0	1	1	1	1	0	1	1	0	1	1	1	1	1	3	0	0	0	0	4	146	35	225	66	31.7064	0.352	0	108	1	108	1	108	108	1	1	SUDDEN DEATH	2	1
1	28	128	56	1	1	31.1728	0	0	0	0	0	0	0	0	1	1	1	0	1	0	0	1	0	0	2	1	1	0	1	0	0	126	34	86	75	67.1933	1.063	0	1139	0	1139	0	1139	1139	0	0		1.2	1
1	31	131	81	1	1	30.2222	0	0	0	0	0	0	0	0	1	1	1	0	1	1	0	1	0	0	2	1	1	0	1	0	0	136	42	122	70	56.3712	2.671	0	1210	0	1210	0	1210	1210	0	0		1.2	1
1	32	132	63	1	1	29.321	0	0	0	0	0	0	0	0	1	1	1	0	1	0	0	1	0	0	2	1	1	0	1	0	0	172	31	384	64	63.9692	4.301	0	1029	0	1029	0	1029	1029	0	0		1.2	1
1	37	137	69	1	1	32.872	0	0	0	0	0	1	0	0	1	1	1	0	1	1	0	0	1	0	2	2	1	1	1	0	1	200	62	199	98	61.3291	0.611	0	1327	0	1327	0	1327	1327	0	0		1.2	1
1	38	138	83	0	1	#NULL!	0	0	1	0	0	0	1	0	1	1	0	0	0	0	0	1	1	1	1	#NULL!		0	0	0	4	150	50	80	84	59.3191	1.016	0	1249	0	1249	0	1249	1249	0	0		0.9	1
1	48	148	58	1	1	28.0102	0	0	1	0	0	0	0	0	0	1	0	0	1	0	1	1	1	0	2	1	1	1	1	0	1	155	54	218	57	93.8157	1.488	0	738	0	738	0	738	738	0	0		0.9	0
1	51	151	77	1	1	#NULL!	0	0	1	0	0	0	0	0	1	1	1	0	1	1	0	1	0	0	2	1	1	1	1	0	1	133	35	144	69	82.094	0.695	0	621	0	621	0	621	621	0	0		0.9	1
1	53	153	37	1	1	28.3737	0	0	0	0	0	0	0	0	1	1	1	0	1	0	0	0	0	0	1	1	1	1	1	0	1	142	45	194	58	76.7875	0.165	0	1339	0	1339	0	1339	1339	0	0		1.2	1
1	55	155	75	1	1	27.1809	0	0	1	0	0	0	0	0	0	1	1	0	1	0	1	0	0	0	1	1	1	1	1	0	1	144	60	64	71	73.298	4.374	0	839	0	839	0	839	839	0	0		1	0
1	56	156	71	1	1	31.935	0	0	1	0	0	0	0	0	1	1	1	0	1	1	0	1	0	0	2	2	1	0	1	0	0	140	56	50	74	85.628	1.452	0	809	0	809	0	809	809	0	0		0.9	1
1	57	157	76	1	1	#NULL!	0	0	1	0	0	0	0	1	1	1	1	0	1	1	0	1	0	0	1	2	0	0	1	0	0	143	43	93	81	86.7732	2.058	0	1226	0	1226	0	1226	1226	0	0		0.8	1
1	58	158	55	1	1	28.441	0	0	1	0	0	0	0	0	0	1	1	0	1	0	1	1	0	0	1	2	1	1	1	0	1	131	34	128	71	84.3543	4.38	0	1129	0	1129	0	1129	1129	0	0		1	0
1	59	159	66	1	1	#NULL!	0	1	1	0	0	0	0	0	1	1	1	0	1	1	0	0	0	0	2	2	1	0	1	0	0	111	38	91	55	88.689	0.547	1	514	1	514	0	848	848	0	0		0.9	1
1	60	160	63	1	1	18.8707	0	0	1	0	0	0	0	0	1	1	0	0	1	0	1	0	0	0	1	1	1	0	1	0	0	160	62	106	77	90.5778	3.392	0	749	0	749	0	749	749	0	0		0.9	1
1	61	161	74	1	1	28.441	1	0	1	0	0	0	1	0	1	1	1	1	1	1	0	1	0	0	1	1	1	1	1	0	1	141	34	156	76	53.7508	3.705	0	615	0	615	0	615	615	0	0		1.3	1
1	62	162	63	1	1	34.2857	0	0	1	0	0	0	1	0	1	0	1	0	1	1	0	1	0	0	2	2	0	0	1	0	0	115	36	54	68	79.7445	0.51	0	925	0	925	0	925	925	0	0		1	1
1	63	163	46	1	1	24.4473	0	0	0	0	0	0	0	0	1	1	1	0	1	0	0	1	0	0	1	3	1	1	1	0	1	132	38	250	44	80.0792	0.894	0	701	0	701	0	701	701	0	0		1.1	1
1	64	164	49	1	1	28.4055	0	0	0	0	0	0	0	0	0	1	0	0	1	1	0	1	0	0	1	1	1	0	1	0	0	142	48	66	81	87.9856	0.587	0	715	0	715	0	715	715	0	0		1	0
1	67	167	39	1	1	#NULL!	0	0	0	0	0	0	0	0	1	1	0	0	1	1	0	0	0	0	2	1	1	0	1	0	0	146	43	93	84	112.529	2.108	0	511	0	511	0	511	511	0	0		0.8	1
2	10	210	49	0	1	35.8127	1	0	1	0	0	0	0	0	1	1	1	0	1	0	0	1	0	1	2	1	1	1	1	0	1	128	34	168	60	75.3217	4.82	0	1138	0	1138	0	1138	1138	0	0		0.9	1
2	11	211	72	1	1	45.2005	1	0	1	1	0	0	0	0	1	0	1	0	1	0	0	0	1	1	1	#NULL!		0	0	0	4	174	68	186	69	60.0501	11.256	0	256	1	234	1	234	256	2	1	Infection	1.2	1
2	13	213	55	1	1	23.2438	0	1	1	0	0	0	0	0	1	0	1	0	1	1	0	1	0	0	1	1	1	0	1	0	0	167	64	140	75	75.1732	0.76	0	1138	0	1138	0	1138	1138	0	0		1.1	1
2	14	214	56	1	1	25.7117	0	0	0	0	0	0	0	0	1	1	1	0	1	1	0	1	1	0	1	1	0	0	0	0	4	161	33	113	105	83.7638	4.416	1	1558	1	1558	0	1593	1593	0	0		1	1
2	15	215	52	0	1	26.9531	0	0	1	0	0	0	0	0	1	1	1	0	1	0	0	1	0	0	1	1	1	0	1	0	0	175	62	135	86	52.0855	1.006	0	1112	0	1112	0	1112	1112	0	0		1.2	1
2	16	216	78	0	1	#NULL!	0	0	0	1	0	0	1	0	1	0	0	1	1	0	1	0	1	0	1	1	0	0	0	0	4	162	50	96	93	54.0913	14.608	0	1125	0	1125	0	1125	1125	0	0		1	1
2	18	218	67	1	1	23.1837	0	0	0	0	0	0	0	0	1	1	1	0	0	1	0	1	1	0	1	1	1	0	1	0	0	170	42	164	95	56.4599	0.433	0	1118	0	1118	0	1118	1118	0	0		1.3	1
2	19	219	54	1	1	#NULL!	0	0	1	0	0	0	0	1	1	1	1	0	1	1	0	1	0	0	2	1	1	1	1	0	1	180	56	106	103	14.5645	34.753	0	1106	0	1106	0	1106	1106	0	0		4.3	1
2	22	222	43	1	1	24.8971	0	0	0	0	0	1	0	0	1	1	1	0	1	0	0	0	0	0	1	2	1	0	0	1	3	190	39	220	107	91.7732	3.581	0	1065	0	1065	0	1065	1065	0	0		1	1
2	24	224	51	1	1	21.7193	0	0	0	1	0	0	0	0	1	1	1	0	1	0	0	0	1	0	1	2	1	1	1	0	1	144	44	92	82	77.3154	6.671	0	1109	0	1109	0	1109	1109	0	0		1.1	1
2	25	225	62	0	1	34.4579	0	0	0	0	0	0	0	0	1	1	0	0	1	0	0	1	0	0	1	3	0	0	1	0	0	128	44	101	64	79.269	1.349	0	1288	0	1288	0	1288	1288	0	0		0.8	1
2	26	226	71	0	1	24.999	1	0	1	0	0	0	0	0	1	1	1	0	1	1	0	1	0	0	1	1	1	1	1	0	1	148	47	92	83	74.4127	0.558	0	1157	0	1157	0	1157	1157	0	0		0.8	1
2	28	228	60	0	1	38.4766	1	0	1	0	0	0	0	0	1	1	0	0	1	1	0	1	0	0	1	0	1	0	0	0	4	110	38	59	60	94.4751	0.831	0	1092	0	1092	0	1092	1092	0	0		0.7	1
2	30	230	52	1	1	28.7319	0	0	0	0	0	0	0	0	0	1	1	0	1	1	0	1	0	0	2	1	1	1	1	0	1	151	72	69	65	86.1508	0.469	0	1078	0	1078	0	1078	1078	0	0		1	0
2	31	231	56	1	1	26.1012	0	0	0	0	0	0	0	1	0	0	0	1	1	1	0	1	0	1	2	1	0	0	0	0	4	125	33	145	63	55.7683	2.807	0	1086	0	1086	0	1086	1086	0	0		1.4	0
2	32	232	46	1	1	29.132	0	0	0	0	0	0	0	0	1	1	0	0	0	0	0	1	0	0	2	0	1	0	0	0	4	171	61	106	89	102.067	15.884	0	1083	0	1083	0	1083	1083	0	0		0.9	1
2	33	233	37	1	1	28.8611	0	0	0	0	0	0	0	0	1	1	0	0	0	0	0	1	0	0	2	0	1	0	0	0	4	183	49	153	103	95.7239	0.891	0	1273	0	1273	0	1273	1273	0	0		1	1
2	34	234	69	0	1	29.3848	0	0	1	0	0	0	0	0	1	1	1	0	1	1	0	1	1	0	1	1	0	0	1	0	0	152	47	120	81	75.4655	1.298	0	1075	0	1075	0	1075	1075	0	0		0.8	1
2	35	235	50	1	1	40.0367	1	0	1	0	0	0	0	0	0	1	1	0	1	1	1	1	0	1	1	3	1	0	1	0	0	145	37	151	78	99.2388	13.187	0	1260	0	1260	0	1260	1260	0	0		0.9	0
2	37	237	66	1	1	28.0864	0	0	0	0	0	0	1	1	1	1	0	0	1	0	1	0	0	0	1	0	1	0	0	0	4	130	37	115	70	69.5833	1.862	0	1099	0	1099	0	1099	1099	0	0		1.1	1
2	39	239	60	1	1	21.4533	0	1	0	0	0	0	0	0	1	1	0	0	1	0	0	0	0	0	1	1	1	0	1	0	0	223	57	72	152	97.0952	20.601	0	1028	0	1028	0	1028	1028	0	0		0.8	1
2	40	240	57	1	1	29.8877	1	0	1	0	0	0	0	0	1	1	1	0	1	1	0	0	0	1	1	2	0	1	1	0	1	128	30	190	60	19.6391	30.843	0	1241	0	1241	0	1241	1241	0	0		3.3	1
2	42	242	80	0	1	32.8824	1	0	1	0	0	1	0	0	1	1	1	0	1	0	1	1	1	0	1	2	1	1	0	0	1	193	76	76	102	53.3367	1.455	0	1016	0	1016	0	1016	1016	0	0		1	1
2	44	244	66	1	1	30.7394	1	0	1	0	0	0	0	0	1	1	1	0	1	0	0	0	1	0	1	1	1	1	1	0	1	142	39	147	74	88.689	2.268	0	996	0	996	0	996	996	0	0		0.9	1
2	46	246	75	1	1	33.564	0	1	0	0	0	0	0	0	0	1	0	0	1	1	0	1	0	0	1	#NULL!		0	0	0	4	130	35	116	72	58.7979	0.609	0	1024	0	1024	0	1024	1024	0	0		1.2	0
2	47	247	73	1	1	30.0781	0	0	1	0	0	0	0	0	0	1	1	0	1	0	0	1	0	0	1	2	1	1	1	0	1	141	35	170	72	66.2445	0.455	1	764	1	764	0	1245	1245	0	0		1.1	0
2	48	248	57	0	1	28.6288	0	0	0	0	0	0	0	1	1	1	1	0	1	1	0	1	0	0	2	2	1	1	1	0	1	158	46	112	90	96.4872	1.666	0	1016	0	1016	0	1016	1016	0	0		0.7	1
2	49	249	72	1	1	23.3951	0	0	1	0	0	1	0	1	0	1	1	0	1	1	0	0	1	1	1	#NULL!		0	0	0	4	130	42	79	72	74.859	1.926	0	1024	0	1024	0	1024	1024	0	0		1	0
2	50	250	58	1	1	30.7599	1	0	1	0	0	0	0	0	0	1	1	0	1	0	1	1	0	0	1	1	1	1	1	0	1	125	29	95	77	73.6056	0.998	0	1015	0	1015	0	1015	1015	0	0		1.1	0
2	51	251	50	1	1	26.5039	0	0	0	0	0	0	0	0	0	1	0	0	1	0	0	1	1	0	1	2	0	0	1	0	0	157	47	111	88	99.2388	0.569	0	1227	0	1227	0	1227	1227	0	0		0.9	0
2	52	252	74	0	1	23.8728	0	0	0	0	0	0	0	1	0	1	0	0	1	0	1	0	0	0	2	0	1	0	0	0	4	155	63	60	80	49.5777	0.728	0	1213	0	1213	0	1213	1213	0	0		1.1	0
2	53	253	47	1	1	28.6661	0	0	0	0	0	0	0	0	0	1	1	0	1	1	0	1	0	0	1	1	1	0	1	0	0	119	37	92	64	89.2304	1.189	0	1011	0	1011	0	1011	1011	0	0		1	0
2	54	254	52	1	1	25.4028	0	1	0	0	0	0	0	0	1	1	1	0	0	0	0	1	0	0	1	1	1	1	1	0	1	181	36	152	115	97.8543	1.453	0	1011	0	1011	0	1011	1011	0	0		0.9	1
2	55	255	56	1	1	23.729	0	0	0	1	0	0	0	0	0	1	1	0	1	0	0	1	1	0	1	2	1	1	0	0	4	197	62	73	120	95.143	4.161	0	969	0	969	0	969	969	0	0		0.9	0
2	56	256	46	0	1	26.6728	0	0	0	0	0	0	0	0	0	1	1	0	1	0	0	1	0	0	1	1	1	1	1	0	1	175	33	775	0	104.238	3.868	0	883	0	883	0	883	883	0	0		0.7	0
2	57	257	50	1	1	25.0995	0	1	0	0	0	0	0	0	0	1	0	0	1	0	0	1	1	0	1	1	0	0	0	0	4	155	34	195	82	87.3697	2.157	0	1197	0	1197	0	1197	1197	0	0		1	0
2	58	258	41	1	1	31.1951	0	1	1	0	0	0	0	0	1	1	0	0	1	1	0	1	0	0	1	#NULL!		0	0	0	4	165	35	324	65	93.0717	2.346	0	1187	0	1187	0	1187	1187	0	0		1	1
2	59	259	61	1	1	28.699	1	0	1	0	0	0	0	0	0	0	1	0	1	1	0	1	0	0	1	2	0	1	1	0	1	149	39	172	76	64.8742	1.736	0	988	0	988	0	988	988	0	0		1.2	0
2	60	260	49	1	1	27.1699	0	0	0	0	0	0	0	0	1	1	1	0	1	0	0	0	0	0	1	1	1	1	1	0	1	120	36	94	65	87.9856	0.24	0	969	0	969	0	969	969	0	0		1	1
2	61	261	52	1	1	36.0082	0	0	1	0	0	1	0	0	1	1	0	0	1	0	0	1	0	1	1	3	0	0	0	1	3	161	37	109	102	102.708	2.819	0	986	0	986	0	986	986	0	0		0.8	1
2	62	262	69	1	1	22.5981	0	0	1	1	0	0	1	0	0	1	1	1	0	1	0	1	0	0	2	1	1	1	1	0	1	155	40	130	89	76.4533	33.27	0	979	0	979	0	979	979	0	0		1	0
2	63	263	49	1	1	28.0816	0	0	0	0	0	0	0	0	0	1	1	0	0	0	0	1	1	0	1	2	1	0	1	0	0	154	39	78	99	87.9856	2.417	0	953	0	953	0	953	953	0	0		1	0
2	64	264	55	1	1	21.7993	0	0	0	0	0	1	0	0	1	1	0	0	1	1	0	0	0	1	1	3	1	0	0	1	3	197	38	240	111	75.1732	1.365	0	963	0	963	0	963	963	0	0		1.1	1
2	65	265	74	1	1	25.0927	0	1	0	1	0	0	0	0	0	1	1	0	1	1	0	1	0	0	1	1	0	1	1	0	1	143	35	120	84	53.7508	2.964	0	909	0	909	0	909	909	0	0		1.3	0
2	66	266	61	1	1	20.5037	0	0	0	0	0	0	0	0	0	1	1	0	1	0	0	0	1	0	1	0	1	0	0	0	4	177	66	64	98	91.8593	0.206	0	893	0	893	0	893	893	0	0		0.9	0
2	67	267	62	1	1	25.1177	0	0	0	0	0	0	0	0	1	1	1	0	1	1	0	1	0	0	2	2	0	1	1	0	1	198	45	65	140	80.3067	1.311	0	965	0	965	0	965	965	0	0		1	1
2	68	268	57	1	1	30.3233	0	0	0	0	0	0	0	0	0	1	1	0	1	0	0	1	0	0	1	1	1	1	1	0	1	168	44	79	108	83.1774	1.709	0	1163	0	1163	0	1163	1163	0	0		1	0
2	69	269	72	1	1	29.3848	0	0	1	0	0	0	0	0	0	1	1	0	1	0	0	1	0	0	1	1	1	1	1	0	1	209	54	159	123	60.0501	4.145	0	963	0	963	0	963	963	0	0		1.2	0
2	70	270	52	1	1	26.7299	0	0	1	0	0	0	0	0	1	1	0	0	1	1	0	1	1	0	2	1	1	0	1	0	0	151	47	78	88	86.1508	0.702	0	911	0	911	0	911	911	0	0		1	1
2	71	271	69	1	1	29.0174	0	0	1	0	0	1	0	0	1	1	0	0	0	1	0	0	0	1	1	2	1	0	0	1	3	130	29	231	55	50.9012	1.036	0	408	0	408	0	408	408	0	0		1.4	1
2	72	272	57	1	1	34.2936	0	1	1	0	0	0	0	0	1	1	1	0	1	0	0	1	0	0	2	1	1	1	1	0	1	143	35	145	79	66.723	5.051	0	962	0	962	0	962	962	0	0		1.2	0
2	73	273	85	0	1	#NULL!	0	0	1	0	0	0	0	0	1	0	0	0	1	0	0	1	1	0	1	#NULL!		0	0	0	4	162	38	333	57	41.3087	11.809	0	954	0	954	0	954	954	0	0		1.2	1
2	74	274	42	0	1	36.9608	0	0	1	0	0	0	0	1	1	1	1	0	1	1	1	1	0	1	2	1	0	1	1	0	1	160	37	162	91	91.226	2.391	0	888	0	888	0	888	888	0	0		0.8	1
2	75	275	59	0	1	34.6476	0	0	0	0	0	0	0	0	0	1	0	0	1	0	0	0	0	0	1	0	1	0	0	0	4	147	46	150	71	70.2122	7.458	1	787	1	787	0	916	916	0	0		0.9	0
2	76	276	51	1	1	29.3575	0	0	1	0	0	0	0	0	1	1	1	0	1	0	0	1	1	0	1	1	1	1	0	0	1	133	30	157	72	69.5953	3.815	0	976	0	976	0	976	976	0	0		1.2	1
2	77	277	59	1	1	22.8374	1	0	1	1	0	0	0	0	1	1	1	0	0	0	0	1	0	0	1	1	1	1	1	0	1	140	41	87	82	97.7796	1.287	1	205	1	205	0	911	911	0	0		0.8	1
2	78	278	76	1	1	#NULL!	0	0	0	0	0	0	0	0	1	1	0	1	1	1	0	1	1	0	2	2	0	0	0	0	4	160	36	113	101	72.7849	50.608	0	913	0	913	0	913	913	0	0		1	1
2	83	283	75	0	1	23.9334	0	0	1	0	0	0	0	0	1	1	0	0	1	0	0	1	1	0	2	2	0	0	0	0	4	158	75	81	67	55.2433	1.193	0	962	0	962	0	962	962	0	0		1	1
2	86	286	56	1	1	29.6875	0	0	0	0	0	0	0	0	1	1	0	0	1	0	0	1	0	0	1	1	1	0	1	0	0	140	40	77	85	95.143	1.415	0	904	0	904	0	904	904	0	0		0.9	1
2	89	289	58	1	1	30.4705	0	0	1	1	0	0	0	0	1	1	0	0	1	1	0	1	1	0	1	1	0	0	0	0	4	149	43	98	86	104.024	2.212	1	436	1	436	0	904	904	0	0		0.7	1
2	90	290	48	1	1	30.1194	0	0	1	0	0	0	0	0	1	1	1	0	1	1	0	1	0	0	2	1	0	1	1	0	1	135	51	83	67	100.643	0.659	0	907	0	907	0	907	907	0	0		0.9	1
2	91	291	51	1	1	29.5816	0	0	0	1	0	0	0	0	0	0	1	0	1	0	0	1	0	0	1	1	1	0	1	0	0	131	26	155	74	86.7581	5.668	0	897	0	897	0	897	897	0	0		1	0
2	92	292	66	0	1	25.7812	0	0	1	0	0	0	0	0	0	1	1	0	0	1	0	1	0	0	1	1	1	1	1	0	4	172	50	122	98	66.8432	3.08	0	1182	0	1182	0	1182	1182	0	0		0.9	0
2	93	293	49	1	1	31.7106	0	0	1	0	0	0	0	0	1	1	1	0	0	1	0	1	0	0	1	2	0	0	0	0	4	203	39	134	137	99.9384	0.645	0	905	0	905	0	905	905	0	0		0.9	1
2	94	294	47	1	1	27.7323	0	0	0	0	0	0	0	0	0	1	1	0	1	1	0	1	0	0	2	1	1	1	1	0	1	118	37	73	66	101.352	2.737	0	891	0	891	0	891	891	0	0		0.9	0
2	95	295	65	0	1	33.3333	0	0	1	0	0	0	0	0	1	1	0	0	1	1	0	1	0	0	1	2	1	1	1	0	1	164	48	159	84	77.616	4.575	0	485	0	485	0	485	485	0	0		0.8	1
2	96	296	44	1	1	24.6755	0	0	0	0	0	0	0	0	0	1	0	0	0	0	0	0	1	0	1	1	0	0	0	0	4	196	40	110	134	103.511	3.62	0	852	0	852	0	852	852	0	0		0.9	0
2	97	297	50	1	1	31.1419	0	0	0	0	0	0	0	0	0	1	0	0	0	0	0	1	0	0	1	2	1	1	1	0	1	227	46	430	95	99.2388	2.378	0	484	0	484	0	484	484	0	0		0.9	0
2	98	298	59	1	1	25.1825	1	0	1	0	0	0	0	0	0	1	0	0	1	1	0	1	0	0	1	1	1	1	1	0	1	130	28	168	68	93.159	6.247	0	854	0	854	0	854	854	0	0		0.9	0
2	99	299	56	1	1	40.0368	1	0	1	0	0	1	0	0	0	1	0	0	0	1	0	1	1	0	1	2	1	0	0	1	3	147	34	126	88	74.647	2.368	0	1047	0	1047	0	1047	1047	0	0		1.1	0
3	10	310	58	1	1	24.4352	1	0	1	0	0	1	0	0	1	1	0	0	0	0	0	1	0	0	1	3	0	0	0	1	4	208	37	272	117	66.2559	7.609	0	1405	0	1405	0	1405	1405	0	0		1.2	1
3	11	311	66	1	1	24.677	0	0	0	0	0	0	0	0	1	1	1	0	1	0	1	1	0	0	1	1	1	1	1	0	1	141	58	119	59	78.0816	0.704	0	1384	0	1384	0	1384	1384	0	0		1	1
3	12	312	58	1	1	32.0204	1	0	1	0	0	1	0	0	1	1	0	0	1	1	0	1	0	0	2	1	1	0	0	1	4	134	39	132	69	82.5952	20.047	0	1389	0	1389	0	1389	1389	0	0		1	1
3	14	314	57	1	1	32.112	1	0	1	0	1	0	0	0	0	1	1	0	1	1	0	1	0	0	1	2	1	1	1	0	1	122	40	56	71	99.1631	1.001	0	1380	0	1380	0	1380	1380	0	0		0.8	0
3	17	317	71	1	1	35.2555	0	0	0	0	0	0	0	0	1	1	1	0	0	0	0	1	1	0	1	1	1	0	1	0	0	154	39	130	89	60.4735	1.599	0	1373	0	1373	0	1373	1373	0	0		1.2	1
3	19	319	58	1	1	24.1672	0	0	1	0	0	0	0	0	1	1	0	0	1	1	0	1	0	0	2	0	1	0	0	0	4	150	48	123	77	82.5952	0.781	0	1365	0	1365	0	1365	1365	0	0		1	1
3	20	320	78	1	1	23.7118	0	0	1	0	0	0	0	1	0	1	0	0	1	1	0	1	0	0	1	3	0	0	0	0	4	161	51	74	95	71.7695	0.659	0	1086	0	1086	0	1086	1086	0	0		1	0
3	21	321	65	1	1	23.7228	0	0	0	0	0	0	0	0	1	1	1	0	0	0	0	1	0	0	2	2	0	0	1	0	0	155	39	106	95	89.3141	11.738	0	1359	0	1359	0	1359	1359	0	0		0.9	1
3	22	322	51	1	1	31.2213	1	0	1	0	0	0	0	1	1	1	1	1	0	0	1	1	0	0	2	3	0	1	1	0	1	146	35	237	64	77.3154	2.48	0	1366	0	1366	0	1366	1366	0	0		1.1	1
3	23	323	55	1	1	28.0277	0	1	1	0	0	0	0	0	0	1	1	0	0	0	1	1	0	1	1	2	1	1	1	0	1	145	30	132	89	67.667	1.136	0	1334	0	1334	0	1334	1334	0	0		1.2	0
3	24	324	25	1	1	30.4053	0	0	0	0	0	0	0	0	0	1	0	0	1	0	0	1	0	0	2	0	1	0	0	0	4	176	31	508	43	92.8081	2.111	0	1232	0	1232	0	1232	1232	0	0		1.1	0
3	25	325	53	0	1	30.7574	0	1	1	0	0	0	0	0	1	1	0	0	1	0	0	1	0	0	1	0	1	0	0	0	4	284	65	108	197	73.2347	3.07	0	1352	0	1352	0	1352	1352	0	0		0.9	1
3	26	326	61	1	1	21.6049	0	1	0	0	0	0	0	0	0	1	1	0	1	0	0	1	0	0	2	1	1	0	1	0	0	154	45	78	93	72.0707	2.055	0	1341	0	1341	0	1341	1341	0	0		1.1	0
3	28	328	86	0	1	20.7	0	0	1	0	0	0	1		1	0	0	1	0	0	0	1	1	0	1	1	0	0	0	0	4	147	38	163	76	41.02	1.044	0	234	1	234	1	234	234	2	1	Diarrhea and kidney failure	1.2	1
3	29	329	46	1	1	27.0169	0	1	1	0	0	1	0	0	1	1	0	0	1	0	0	1	0	0	2	3	1	0	0	1	3	152	37	63	102	102.067	16.199	0	1307	0	1307	0	1307	1307	0	0		0.9	1
3	30	330	42	0	1	31.0547	1	0	0	0	0	0	0	0	1	1	0	0	1	1	0	1	0	0	2	0	1	0	0	0	4	184	38	212	104	91.226	5.203	0	1306	0	1306	0	1306	1306	0	0		0.8	1
3	31	331	79	0	1	39.0875	0	0	1	0	0	0	0	0	1	1	1	0	1	0	1	0	0	0	2	1	0	1	1	0	1	204	56	209	106	70.3462	4.184	0	1269	0	1269	0	1269	1269	0	0		0.8	1
3	32	332	72	1	1	26.919	0	0	1	0	0	1	0	0	0	1	1	0	1	1	0	1	0	0	1	3	0	0	1	0	0	195	42	235	106	45.8511	2.933	1	896	1	896	0	1311	1311	0	0		1.5	0
3	33	333	54	1	1	29.685	0	0	0	0	0	0	0	0	0	1	1	0	1	0	0	1	0	0	2	2	0	1	1	0	1	131	40	175	56	75.7032	0.432	0	1313	0	1313	0	1313	1313	0	0		1.1	0
3	34	334	69	1	1	37.5776	1	0	1	0	0	0	0	0	0	1	0	0	1	0	1	1	1	1	1	2	0	1	1	0	1	179	38	288	83	86.8395	2.66	1	796	1	796	1	796	796	1	1	HEART FAILURE AND NSTEACS	0.9	0
3	35	335	38	1	1	21.7181	0	0	0	0	0	0	0	0	1	1	1	0	1	1	0	0	0	0	2	1	1	0	1	0	0	119	43	63	63	84.7083	1.072	0	1247	0	1247	0	1247	1247	0	0		1.1	1
3	36	336	57	1	1	26.1719	0	0	1	0	0	0	0	0	1	1	0	0	1	0	1	1	1	0	1	2	0	0	1	0	0	152	30	278	66	66.723	1.422	0	1250	0	1250	0	1250	1250	0	0		1.2	0
3	37	337	53	1	1	24.6755	0	0	1	0	0	0	0	0	1	0	1	0	1	0	1	1	0	0	1	1	0	0	1	0	0	150	47	87	86	62.2947	5.301	0	1207	0	1207	0	1207	1207	0	0		1.3	1
3	38	338	62	1	1	32.8125	0	0	0	0	0	0	0	0	1	1	0	0	0	0	0	1	0	0	1	1	1	0	1	0	0	171	53	116	95	80.3067	21.431	0	1215	0	1215	0	1215	1215	0	0		1	1
3	39	339	75	0	1	32.4661	0	0	1	0	0	0	0	0	0	1	0	0	1	0	1	1	0	0	2	1	0	0	0	0	4	142	45	137	70	55.2433	0.317	0	1237	0	1237	0	1237	1237	0	0		1	0
3	40	340	61	0	1	37.3338	0	0	1	0	0	0	0	0	1	1	1	0	1	0	1	0	0	1	1	1	1	0	1	0	0	170	41	136	102	54.3183	6.383	0	1226	0	1226	0	1226	1226	0	0		1.1	1
3	41	341	51	1	1	28.3848	0	0	0	0	0	0	0	0	1	1	1	0	1	0	0	1	0	0	1	1	1	1	1	0	1	172	50	293	63	86.7581	8.079	0	1236	0	1236	0	1236	1236	0	0		1	1
3	42	342	45	1	1	29.1421	1	0	1	0	0	0	0	0	1	0	1	0	1	1	0	1	0	0	1	2	0	0	0	0	4	157	42	92	97	80.6438	1.173	0	1234	0	1234	0	1234	1234	0	0		1.1	0
3	43	343	58	1	1	32.0312	0	0	0	0	0	0	0	0	1	1	1	0	1	0	0	1	0	0	1	1	1	0	1	0	0	189	70	93	100	82.5952	32.775	0	1208	0	1208	0	1208	1208	0	0		1	1
3	44	344	82	1	1	28.6501	0	0	0	0	0	0	0	0	1	1	0	0	1	0	0	1	0	0	1	1	1	0	1	0	0	149	45	69	90	69.7809	1.555	0	1206	0	1206	0	1206	1206	0	0		1	1
3	45	345	49	0	1	29.3724	0	0	1	0	0	0	0	0	0	1	0	0	1	1	0	0	0	0	1	0	1	0	0	0	4	205	48	289	99	107.375	12.01	0	1260	0	1260	0	1260	1260	0	0		0.6	0
3	46	346	60	1	1	28.3737	1	0	1	0	0	0	0	0	0	1	1	0	1	0	1	1	0	1	1	2	1	1	1	0	1	192	53	123	114	72.5787	0.951	0	1208	0	1208	0	1208	1208	0	0		1.1	0
3	47	347	73	1	1	30.0433	1	0	1	1	0	0	0	0	1	1	1	0	1	0	1	1	0	0	1	1	0	1	0	0	1	155	44	112	89	54.1297	4.983	0	1213	0	1213	0	1213	1213	0	0		1.3	1
3	48	348	74	1	1	28.5156	0	0	1	0	0	1	0	0	1	1	0	0	1	1	0	1	0	0	1	3	0	0	0	1	3	148	49	143	70	41.8178	1.591	0	1244	0	1244	0	1244	1244	0	0		1.6	1
3	49	349	67	1	1	30.2222	0	0	1	1	0	0	1	0	0	0	1	1	1	0	1	0	1	1	1	1	1	1	1	0	1	329	67	431	176	69.0962	11.475	0	1229	0	1229	0	1229	1229	0	0		1.1	0
3	50	350	57	1	1	33.2031	0	0	1	0	0	0	0	0	1	1	1	0	1	0	0	1	0	0	1	2	0	1	1	0	1	163	35	299	68	83.1774	2.205	0	1296	0	1296	0	1296	1296	0	0		1	1
3	51	351	46	0	1	31.25	0	0	1	0	0	0	0	0	1	1	1	0	1	1	0	1	1	0	1	1	0	0	0	0	4	147	41	121	82	104.238	0.332	0	1120	0	1120	0	1120	1120	0	0		0.7	1
3	52	352	77	0	1	26.4453	1	0	0	0	0	0	0	0	0	1	1	0	1	0	0	1	0	0	1	3	0	1	1	0	1	121	45	122	52	71.3415	21.22	0	872	0	872	0	872	872	0	0		0.8	0
3	53	353	63	1	1	36.7309	0	0	1	0	0	0	0	0	1	1	1	0	1	1	0	1	0	0	2	1	1	1	1	0	1	108	30	93	59	63.9692	2.759	0	1116	0	1116	0	1116	1116	0	0		1.2	1
3	54	354	59	1	1	38.2812	0	0	1	0	0	0	0	0	1	1	1	0	1	1	0	1	0	0	1	2	0	0	1	0	0	141	42	65	86	82.017	3.537	0	1117	0	1117	0	1117	1117	0	0		1	1
3	55	355	52	1	1	21.8359	1	0	1	0	0	0	0	0	1	1	1	0	1	1	0	1	0	0	1	3	0	1	1	0	1	136	42	152	64	102.708	0.574	0	1077	0	1077	0	1077	1077	0	0		0.8	1
3	56	356	74	1	1	26.5021	1	0	1	0	0	0	0	0	0	1	1	0	1	0	1	1	0	0	1	1	1	1	1	0	1	140	63	98	57	73.8147	0.402	0	1103	0	1103	0	1103	1103	0	0		1	0
3	58	358	61	1	1	27.6095	0	0	1	0	1	0	0	0	1	1	0	0	1	0	1	1	0	1	1	1	1	0	1	0	0	147	41	177	71	58.8905	0.734	0	1197	0	1197	0	1197	1197	0	0		1.3	1
3	60	360	60	1	1	23.6838	0	0	0	0	0	0	0	0	1	1	0	0	1	0	0	1	0	0	2	2	0	0	1	0	0	157	44	101	93	92.5069	0.546	0	1149	0	1149	0	1149	1149	0	0		0.9	1
3	61	361	58	1	1	30.4076	1	0	1	0	0	0	0	0	1	1	1	0	0	0	1	1	0	0	1	2	0	1	1	0	1	207	38	178	133	66.2559	0.468	0	714	0	714	0	714	714	0	0		1.2	1
3	62	362	44	1	1	35.8302	0	0	1	0	0	0	0	0	1	1	1	0	0	0	0	1	0	0	1	1	1	1	1	0	1	245	46	265	146	91.1308	1.488	1	248	1	248	0	994	994	0	0		1	1
3	63	363	37	1	1	22.9819	0	0	0	0	0	0	0	1	1	1	1	0	0	0	1	1	0	0	2	1	1	1	1	0	1	150	43	92	89	69.7048	0.284	0	1011	0	1011	0	1011	1011	0	0		1.3	1
3	64	364	50	1	1	34.1311	0	0	1	0	0	0	0	0	1	1	1	0	0	0	0	1	0	0	1	#NULL!		0	0	0	4	133	36	90	79	63.6214	3.711	0	1044	0	1044	0	1044	1044	0	0		1.3	1
3	65	365	61	1	1	28.125	0	1	1	0	0	0	0	0	1	1	1	0	1	0	0	1	0	0	2	1	1	0	1	0	0	170	37	235	86	80.8728	3.68	0	1008	0	1008	0	1008	1008	0	0		1	1
3	66	366	61	1	1	32.716	1	0	1	0	0	0	0	1	1	1	1	0	1	0	1	1	0	0	2	2	0	1	1	0	1	142	30	178	76	96.4155	0.58	0	976	0	976	0	976	976	0	0		0.8	1
3	67	367	46	0	1	30.4867	1	0	1	0	0	0	0	0	1	1	1	0	1	0	0	1	0	0	2	1	1	1	1	0	1	203	56	164	114	67.7254	3.859	1	653	1	653	0	1002	1002	0	0		1	1
3	68	368	69	1	1	27.3437	1	0	1	0	0	0	1	0	1	1	1	0	0	0	0	1	1	0	1	2	1	1	1	0	1	143	45	105	77	91.1467	1.282	0	976	0	976	0	976	976	0	0		0.8	1
3	70	370	58	1	1	35.9963	0	0	0	0	0	0	0	0	1	1	1	0	0	1	0	0	0	0	2	1	1	1	1	0	1	178	38	86	123	73.6056	2.167	0	954	0	954	0	954	954	0	0		1.1	1
3	71	371	69	1	1	28.0816	1	0	1	0	0	0	0	0	0	1	1	0	0	0	1	1	0	0	1	2	0	1	1	0	1	156	38	110	96	86.8395	2.657	0	913	0	913	0	913	913	0	0		0.9	0
3	72	372	59	1	1	25.7117	0	0	0	0	0	0	0	1	1	1	0	0	1	0	1	1	1	0	2	3	0	0	1	0	0	109	27	125	57	82.017	3.777	0	903	0	903	0	903	903	0	0		1	1
3	73	373	57	1	1	30.3871	1	0	1	0	0	0	0	0	0	1	0	0	1	1	0	1	0	0	2	1	1	0	1	0	0	102	40	74	47	83.1774	0.537	0	860	0	860	0	860	860	0	0		1	0
3	75	375	40	0	0	29.1363	0	0	0	0	0	0	0	0	0	1	1	0	1	0	0	1	0	0	2	1	1	1	1	0	1	140	37	86	86	108.726	2.644	0	876	0	876	0	876	876	0	0		0.7	0
3	76	376	47	1	0	28.306	1	1	0	0	0	0	0	0	0	1	0	0	1	1	0	0	0	0	1	1	1	1	1	0	1	356	49	966	114	79.5187	7.936	0	931	0	931	0	931	931	0	0		1.1	0
3	77	377	58	1	1	29.7578	0	0	0	0	0	0	0	0	1	1	0	0	1	1	0	1	1	0	1	0	1	0	0	0	4	188	42	331	80	73.6056	2.277	0	877	0	877	0	877	877	0	0		1.1	0
3	78	378	54	1	1	27.4145	1	0	1	0	1	0	0	0	1	1	1	0	1	1	0	1	0	0	2	1	1	1	1	0	1	141	36	114	82	75.7032	0.262	0	842	0	842	0	842	842	0	0		1.1	1
3	79	379	42	1	1	25.3815	0	0	0	0	0	0	0	0	1	1	1	0	1	0	0	1	1	0	1	2	1	1	1	0	1	147	39	149	78	110.182	0.433	0	887	0	887	0	887	887	0	0		0.8	1
3	80	380	70	1	1	30.2344	0	0	1	0	0	0	0	0	1	1	0	0	0	0	1	1	1	0	1	1	1	0	1	0	0	188	47	186	104	67.6553	1.485	1	426	1	426	0	921	921	0	0		1.1	1
3	81	381	61	0	1	31.1111	0	0	1	0	0	0	0	0	1	1	0	0	0	0	0	1	0	0	2	1	1	0	1	0	0	190	46	131	118	79.8278	2.684	0	861	0	861	0	861	861	0	0		0.8	1
3	82	382	46	1	1	28.0863	0	0	1	0	0	0	0	0	1	1	0	0	0	1	0	1	0	0	2	1	1	0	1	0	0	183	44	588	21	102.067	4.173	0	811	0	811	0	811	811	0	0		0.9	1
3	83	383	67	1	1	26.2375	0	0	1	0	0	0	0	0	1	1	0	0	1	1	0	1	0	0	2	2	0	0	0	0	0	143	41	82	86	62.1968	1.246	1	247	1	247	0	773	773	0	0		1.2	1
3	84	384	42	1	1	27.0993	0	0	0	0	0	0	0	0	1	1	0	0	0	0	0	1	0	0	1	1	1	0	1	0	0	200	52	132	122	104.975	3.391	0	775	0	775	0	775	775	0	0		0.9	1
3	86	386	55	1	1	30.3673	0	0	0	0	0	0	0	0	1	1	0	0	1	1	0	1	0	0	2	0	1	0	0	0	4	147	39	77	93	100.566	1.905	0	813	0	813	0	813	813	0	0		0.8	1
3	87	387	55	1	1	33.6593	0	0	1	0	0	1	0	0	1	0	1	0	1	0	1	1	0	0	1	1	0	0	0	1	3	188	37	290	93	84.3543	3.65	0	774	0	774	0	774	774	0	0		1	1
3	88	388	49	1	1	26.7299	0	0	1	0	0	0	0	1	1	1	1	0	0	1	0	1	0	0	2	1	1	1	1	0	1	160	47	78	97	99.9384	0.23	0	746	0	746	0	746	746	0	0		0.9	1
3	89	389	57	1	1	23.7954	0	0	0	0	0	0	0	0	1	1	1	0	1	0	1	1	0	0	2	1	1	1	1	0	1	148	39	112	87	83.1774	3.136	0	817	0	817	0	817	817	0	0		1	1
3	90	390	70	1	1	36.3322	0	0	1	0	0	0	0	0	0	1	1	0	1	0	1	1	1	1	1	2	0	0	1	0	0	144	51	67	80	46.4998	3.013	0	747	0	747	0	747	747	0	0		1.5	0
3	91	391	75	1	1	35.0556	0	0	1	0	0	0	0	0	1	1	0	0	0	0	0	0	0	0	1	1	1	0	1	0	0	163	45	60	106	83.2555	2.89	0	783	0	783	0	783	783	0	0		0.9	1
3	92	392	56	1	1	28.7319	0	1	0	0	0	0	0	0	1	1	1	0	1	0	0	1	0	0	2	1	1	0	1	0	0	178	39	210	97	95.143	3.059	0	811	0	811	0	811	811	0	0		0.9	1
3	93	393	46	0	1	24.0385	0	0	1	0	0	0	0	0	1	1	1	0	1	1	1	1	0	0	1	2	0	1	1	0	1	164	41	164	90	104.238	0.347	0	764	0	764	0	764	764	0	0		0.7	1
3	94	394	58	1	1	28.6851	0	0	1	0	0	0	0	0	1	1	0	0	0	1	0	1	0	0	1	1	0	0	0	0	4	147	33	103	93	82.5952	0.782	0	924	0	924	0	924	924	0	0		1	1
3	95	395	65	1	1	32.716	0	0	1	0	1	0	0	0	1	1	0	1	1	1	0	1	1	1	1	1	0	0	0	0	4	151	35	356	45	48.1621	1.921	0	819	0	819	0	819	819	0	0		1.5	1
3	96	396	46	1	1	28.0428	0	0	0	0	0	0	0	0	1	1	0	0	1	0	0	1	0	0	1	1	1	1	1	0	1	189	57	132	106	80.0792	0.502	0	515	0	515	0	515	515	0	0		1.1	1
3	97	397	48	1	1	27.9248	0	0	1	1	0	0	0	0	1	0	1	0	1	1	0	1	0	0	2	2	0	1	1	0	1	147	31	198	76	78.9621	12.45	0	769	0	769	0	769	769	0	0		1.1	1
3	98	398	60	1	1	31.7901	0	0	0	0	0	0	0	0	1	1	1	0	0	0	0	1	1	0	1	1	1	1	1	0	1	154	36	145	89	65.3316	3.371	0	690	0	690	0	690	690	0	0		1.2	1
3	99	399	48	1	1	32.4571	0	1	1	0	0	0	0	0	1	1	0	0	1	1	0	1	0	0	1	0	1	0	0	0	4	146	36	180	74	78.9621	0.958	0	687	0	687	0	687	687	0	0		1.1	1
4	10	410	65	0	1	19.0965	0	0	1	0	0	0	0	0	1	1	0	0	1	0	1	0	0	1	1	0	1	0	0	0	4	136	59	70	63	77.616	0.984	0	1383	0	1383	0	1383	1383	0	0		0.8	1
4	11	411	78	0	1	29.7749	1	0	1	0	1	0	1	0	1	1	1	0	0	1	0	0	0	1	2	1	1	1	1	0	1	147	26	112	99	24.8951	37.018	0	1427	1	661	1	661	1427	0	0		1.9	1
4	12	412	74	0	1	27.0552	1	0	1	0	0	1	0	0	1	1	1	0	0	0	1	1	1	0	1	2	0	1	1	0	1	138	46	82	76	49.5777	11.939	1	63	1	63	0	1266	1266	0	0		1.1	1
4	13	413	76	0	1	23.9334	0	0	1	0	0	0	0	0	1	1	1	0	1	1	1	1	0	0	2	1	1	1	1	0	1	145	43	114	79	62.3088	0.973	1	34	1	34	0	1169	1169	0	0		0.9	1
4	14	414	73	1	1	30.0092	0	0	1	0	0	0	0	0	1	1	1	0	1	0	1	1	0	0	1	3	0	1	1	0	1	133	56	41	69	66.2445	2.195	0	1191	0	1191	0	1191	1191	0	0		1.1	0
4	15	415	69	1	1	36.5473	0	0	0	0	0	0	1	0	1	1	1	0	1	0	0	0	0	0	1	2	0	1	1	0	1	154	49	88	87	86.8395	2.452	1	1210	1	1210	0	1433	1433	0	0		0.9	1
4	16	416	79	1	1	26.0197	0	0	1	0	0	0	0	0	1	1	1	0	1	0	0	0	0	0	2	1	1	0	1	0	0	120	51	78	53	80.9487	28.779	0	1294	0	1294	0	1294	1294	0	0		0.9	1
4	17	417	80	1	1	27.5391	0	0	1	0	0	0	0	0	1	1	1	0	1	1	0	1	0	1	1	1	1	1	1	0	1	128	39	90	71	63.0659	1.266	0	1176	0	1176	0	1176	1176	0	0		1.1	1
4	18	418	86	0	1	25.7778	0	0	1	0	0	0	0	1	1	1	1	0	1	1	0	1	1	0	2	2	0	1	1	0	1	165	45	200	80	34.0449	2.778	0	930	1	930	1	930	930	2	1	Pancreatitis	1.4	1
4	20	420	80	0	1	28.5536	1	0	1	0	1	0	0	1	1	1	1	1	0	0	0	0	1	0	2	2	1	1	1	0	1	100	34	121	42	47.5316	1.397	1	122	1	122	1	1096	1096	2	1	general deterioration and diabetic ulcers	1.1	1
4	23	423	48	1	1	26.7848	0	0	1	0	0	0	0	0	1	1	1	0	0	0	0	0	0	0	1	1	0	0	0	0	4	179	33	144	117	100.643	7.808	0	1178	0	1178	0	1178	1178	0	0		0.9	1
4	24	424	83	1	1	24.9581	0	0	1	0	0	0	0	1	1	1	1	0	1	1	0	0	0	1	2	2	1	1	1	0	1	183	48	110	113	61.7507	0.89	0	1519	0	1519	0	1519	1519	0	0		1.1	1
4	25	425	78	1	1	36.3322	1	0	1	0	0	0	1	0	1	1	0	1	1	1	0	1	1	1	1	2	0	0	0	0	4	149	45	109	82	57.5718	6.899	0	371	1	371	1	371	371	2	1	Unknown	1.2	1
4	26	426	78	1	1	25.5296	1	0	1	0	1	0	0	0	1	0	1	1	1	0	1	1	0	1	2	3	0	1	1	0	1	122	29	119	59	37.7857	11.482	0	1443	0	1443	0	1443	1443	0	0		1.7	1
4	27	427	89	1	1	23.2335	0	0	1	0	0	1	0	0	1	1	0	0	1	0	0	0	1	1	1	1	0	0	0	0	4	126	37	78	73	66.4326	0.733	0	1410	1	1410	1	1410	1410	2	1	Rectal bleeding with hemodynamic instability	1	1
4	28	428	51	0	1	28.1337	0	0	1	0	0	0	0	0	1	1	0	0	1	0	0	1	0	1	2	1	1	1	1	0	1	180	39	166	108	85.6371	1.848	0	1141	0	1141	0	1141	1141	0	0		0.8	0
4	29	429	63	0	1	23.5588	0	0	1	0	0	0	0	0	1	1	1	0	0	1	0	1	0	0	1	1	1	1	1	0	1	156	49	81	91	78.7142	0.185	0	1371	0	1371	0	1371	1371	0	0		0.8	1
4	30	430	78	1	1	24.0588	0	0	1	0	0	0	1	0	0	0	1	0	1	1	0	1	1	0	2	2	0	1	1	0	1	137	36	88	83	81.5193	0.768	0	1331	0	1331	0	1331	1331	0	0		0.9	0
4	31	431	49	1	0	36.5052	0	0	1	0	0	0	0	0	1	1	1	0	1	1	0	1	0	1	2	2	1	1	1	0	1	253	45	180	172	99.9384	2.538	1	1669	1	1669	0	1673	1673	0	0		0.9	1
4	32	432	58	1	0	30.854	1	0	1	0	0	0	0	0	1	1	1	0	1	1	0	1	0	1	2	1	0	1	0	0	1	151	51	117	77	98.4689	0.403	0	1506	0	1506	0	1506	1506	0	0		0.8	1
4	33	433	58	0	1	30.5333	1	0	1	0	0	0	0	0	1	1	1	0	1	1	0	1	1	1	1	3	0	0	0	0	4	136	37	160	67	95.8118	2.873	0	1520	0	1520	0	1520	1520	0	0		0.7	0
4	34	434	83	0	1	26.2222	0	0	1	0	0	0	0	0	1	1	1	0	1	1	0	0	0	0	1	0	1	0	0	0	4	153	73	52	70	46.5404	1.237	0	1477	0	1477	0	1477	1477	0	0		1.1	1
4	35	435	46	1	1	23.4607	0	0	0	0	0	0	0	0	1	0	0	0	0	0	0	0	0	0	2	2	1	1	1	0	1	156	45	113	88	102.067	5.086	0	1158	0	1158	0	1158	1158	0	0		0.9	1
4	36	436	55	1	1	30.1871	0	0	1	0	0	0	0	0	1	1	1	0	1	1	0	1	0	0	2	2	1	1	1	0	1	129	41	111	66	84.3543	4.458	0	1442	0	1442	0	1442	1442	0	0		1	1
4	37	437	85	0	1	23.4375	0	0	1	1	0	0	0	0	1	0	1	0	1	1	0	1	0	1	1	3	0	0	0	0	4	193	37	276	101	41.3087	2.843	1	1039	1	1039	1	1039	1039	1	1	NSTEACS and cholecystitis	1.2	1
4	38	438	64	1	1	24.0588	0	0	1	0	0	0	0	0	1	1	1	0	1	1	0	0	1	0	1	2	1	1	1	0	1	137	54	94	64	89.9438	0.738	0	391	1	391	1	391	391	2	1	pancreatic cancer	0.9	1
4	39	439	61	1	1	32.0062	0	0	1	0	0	0	0	0	0	1	1	0	1	1	0	1	0	1	1	2	0	1	1	0	1	179	42	140	109	91.8593	0.975	0	1137	0	1137	0	1137	1137	0	0		0.9	0
4	40	440	76	0	1	26.2712	0	0	1	0	0	0	0	0	1	0	1	0	0	0	0	0	0	0	1	0	1	0	0	0	4	214	68	106	125	62.3088	0.648	0	1454	1	1452	1	1452	1454	0	0		0.9	1
4	41	441	50	0	1	32.0459	1	0	0	0	0	0	0	0	0	1	1	0	1	1	0	1	0	0	2	0	1	0	1	0	0	211	61	109	128	101.35	5.187	0	1128	0	1128	0	1128	1128	0	0		0.7	0
4	42	442	77	0	1	31.1301	0	0	1	0	0	0	1	0	1	0	1	1	1	0	1	1	0	1	1	2	1	1	1	0	1	184	51	81	117	61.8727	2.588	0	1464	0	1464	0	1464	1464	0	0		0.9	1
4	43	443	67	1	1	27.0168	0	0	1	0	0	0	0	0	0	0	0	0	0	0	0	0	0	0	1	1	1	0	1	0	0	160	40	166	87	77.535	2.386	0	1256	0	1256	0	1256	1256	0	0		1	0
4	44	444	74	1	1	35.2653	1	0	1	0	0	0	0	0	1	1	1	0	1	0	0	1	0	0	2	2	0	1	1	0	1	125	34	78	75	53.7508	4.002	0	1099	0	1099	0	1099	1099	0	0		1.3	1
4	45	445	85	0	1	24.4444	0	0	1	0	0	0	1	1	0	0	0	0	0	0	0	0	0	0	2	1	1	0	1	0	0	205	58	104	126	41.3087	0.801	0	1484	1	1484	1	1484	1484	0	0		1.2	0
4	46	446	80	0	1	30	0	0	1	0	0	1	0	0	1	1	1	0	1	1	0	1	0	0	1	1	0	1	1	0	1	125	35	142	62	35.5105	0.856	1	1394	1	1394	0	1411	1411	0	0		1.4	1
4	47	447	75	1	1	23.5935	0	1	1	0	0	0	0	0	1	1	0	0	1	1	0	1	0	0	2	1	1	0	1	0	0	180	42	109	116	53.3746	81.468	0	1148	0	1148	0	1148	1148	0	0		1.3	1
4	48	448	61	1	1	38.37	0	0	1	0	0	0	0	0	1	1	1	0	0	0	0	0	0	0	2	3	0	0	1	0	0	203	59	147	115	80.8728	2.421	1	984	1	984	0	1467	1467	0	0		1	1
4	50	450	81	0	1	22.0699	1	0	0	0	0	0	0	0	1	1	1	0	1	1	0	1	0	0	2	3	1	1	1	0	1	153	67	76	71	69.3648	1.194	0	1449	0	1449	0	1449	1449	0	0		0.8	1
4	51	451	79	0	1	25.0376	1	0	1	0	0	0	0	0	1	1	1	0	1	1	0	1	0	1	2	2	0	1	1	0	1	108	39	120	45	61.0095	1.005	0	1418	0	1418	0	1418	1418	0	0		0.9	1
4	52	452	78	1	1	24.2639	0	0	0	0	1	0	0	0	1	1	1	0	1	1	0	1	0	0	1	1	1	0	1	0	0	146	35	103	90	71.7695	3.223	0	1106	0	1106	0	1106	1106	0	0		1	1
4	54	454	59	1	1	26.1738	0	0	0	0	0	0	0	0	1	1	1	0	1	1	0	1	0	0	1	1	1	1	1	0	1	166	41	84	108	82.017	1.242	0	1106	0	1106	0	1106	1106	0	0		1	1
4	55	455	47	1	1	37.1486	0	0	1	0	0	0	0	0	1	1	1	0	1	1	0	1	0	1	1	1	1	0	1	0	0	107	30	66	64	106.379	1.729	0	1101	0	1101	0	1101	1101	0	0		0.8	1
4	56	456	80	0	1	27.1159	0	0	1	0	1	0	0	1	1	1	0	0	1	0	1	1	0	1	2	2	0	0	1	0	0	145	46	120	75	53.3367	2.958	0	1279	0	1279	0	1279	1279	0	0		1	1
4	57	457	53	1	0	28.905	0	0	1	0	0	0	0	0	1	1	0	0	1	0	0	1	0	0	1	1	1	0	1	0	0	198	45	178	117	85.5477	0.761	0	1107	0	1107	0	1107	1107	0	0		1	1
4	58	458	77	1	1	24.2568	0	0	0	0	0	0	0	0	1	1	1	0	1	0	1	1	0	0	1	2	1	1	1	0	1	134	46	69	74	82.094	0.529	0	1279	0	1279	0	1279	1279	0	0		0.9	1
4	59	459	50	0	1	31.9692	0	1	1	0	0	0	0	0	1	1	1	0	1	1	0	0	0	0	1	1	1	0	1	0	0	186	92	91	76	52.8224	3.833	0	1154	0	1154	0	1154	1154	0	0		1.2	1
4	60	460	78	1	1	23.5102	0	0	1	0	0	0	0	0	1	1	0	0	1	1	0	1	0	0	2	1	1	0	1	0	0	125	50	85	58	57.5718	0.36	0	896	0	896	0	896	896	0	0		1.2	0
4	61	461	60	1	1	27.6471	1	0	0	0	0	0	0	1	0	1	1	0	1	1	0	1	1	0	2	3	0	1	1	0	1	109	43	60	54	59.3056	0.617	0	1089	0	1089	0	1089	1089	0	0		1.3	0
4	62	462	67	0	1	24.8195	0	0	1	0	0	0	0	0	1	1	0	0	1	0	0	1	0	0	1	1	0	0	0	0	4	171	56	130	89	58.4367	0.119	0	1094	0	1094	0	1094	1094	0	0		1	1
4	63	463	60	1	1	30.9065	0	0	0	0	0	0	0	0	1	1	1	0	1	1	0	0	0	0	1	1	1	1	1	0	1	93	28	51	55	81.4429	0.535	0	1071	0	1071	0	1071	1071	0	0		1	1
4	64	464	75	0	1	32.7652	0	0	1	0	0	0	0	0	0	1	1	0	1	1	0	1	0	0	1	1	1	1	1	0	1	139	44	143	66	85.0269	2.392	0	1080	0	1080	0	1080	1080	0	0		0.7	0
4	65	465	74	1	1	30.7345	1	0	1	0	0	0	0	0	1	1	1	0	1	1	0	0	1	1	1	1	0	0	0	0	4	153	35	223	73	65.7808	0.893	0	1019	0	1019	0	1019	1019	0	0		1.1	1
4	66	466	53	1	1	23.5294	0	0	1	0	0	0	0	0	0	1	1	0	1	1	0	1	0	0	1	2	0	1	1	0	1	157	37	98	100	97.1693	6.982	0	1354	0	1354	0	1354	1354	0	0		0.9	0
4	67	467	66	1	1	24.8097	1	0	0	1	0	0	0	1	1	1	1	0	1	1	0	0	0	0	1	1	0	0	0	0	4	148	41	135	80	88.689	0.809	0	1073	0	1073	0	1073	1073	0	0		0.9	1
4	68	468	68	0	1	24.1147	0	0	1	0	0	0	0	0	1	1	1	0	1	0	1	0	0	1	1	1	0	1	1	0	1	147	49	126	73	89.3123	0.912	0	1385	0	1385	0	1385	1385	0	0		0.7	0
4	69	469	81	0	1	29.2	0	0	1	0	0	1	0	0	1	1	0	0	1	0	0	1	1	0	1	3	1	0	0	1	3	187	45	129	116	52.9633	0.466	0	1381	0	1381	0	1381	1381	0	0		1	1
4	70	470	72	1	1	27.3633	0	0	1	0	0	1	0	1	1	0	1	1	1	1	0	1	1	1	1	2	0	1	1	0	1	144	47	80	81	85.0286	0.635	1	166	1	166	1	439	166	1	1	Sudden death	0.9	1
4	71	471	64	1	1	26.7222	0	0	1	0	0	0	0	0	1	1	1	0	1	1	0	1	0	0	1	1	1	1	1	0	1	129	35	192	56	48.5016	20.622	0	1069	0	1069	0	1069	1069	0	0		1.5	0
4	72	472	51	0	1	25.0866	1	0	1	0	0	0	0	0	1	1	0	0	1	1	0	1	0	0	2	1	1	1	1	0	1	128	55	87	56	65.3879	4.155	1	51	1	51	1	233	233	2	1	Lung cancer	1	1
4	73	473	72	1	1	26.9185	1	0	1	0	0	0	0	0	1	1	1	0	1	1	0	1	0	1	1	1	1	1	1	0	1	103	30	106	52	49.8397	0.703	0	1142	0	1142	0	1142	1142	0	0		1.4	0
4	74	474	55	1	1	27.5391	0	0	1	0	0	0	0	1	0	1	0	0	1	0	1	1	0	0	2	1	1	0	1	0	0	137	35	122	78	75.1732	1.085	0	1152	0	1152	0	1152	1152	0	0		1.1	0
4	75	475	72	0	1	23.589	0	0	1	0	0	0	0	0	0	1	1	0	0	1	0	1	0	1	2	1	1	0	1	0	0	159	50	153	78	37.5632	5.739	0	1011	0	1011	0	1011	1011	0	0		1.4	0
4	76	476	68	0	1	22.9568	0	0	1	0	0	0	0	0	0	1	0	0	1	1	0	0	1	0	1	0	1	0	0	0	4	137	45	145	63	46.5484	0.261	0	1295	0	1295	0	1295	1295	0	0		1.2	0
4	77	477	81	1	1	23.8367	1	0	1	0	0	0	0	0	1	1	0	0	1	1	0	1	0	0	2	0	0	0	0	0	4	143	48	70	81	56.3712	0.542	0	1158	1	1158	1	1158	1158	2	1	Esophagus cancer	1.2	1
4	78	478	68	0	1	25.5428	0	0	0	0	0	0	0	0	1	1	0	0	1	0	0	0	1	0	1	0	1	0	0	0	4	221	60	139	133	58.0276	2.754	0	1371	0	1371	0	1371	1371	0	0		1	1
4	79	479	73	1	1	29.4922	0	0	0	0	0	0	0	0	1	1	0	0	0	1	0	0	0	1	2	1	1	0	1	0	0	164	44	90	102	59.6298	7.338	0	1143	0	1143	0	1143	1143	0	0		1.2	1
4	80	480	71	1	1	29.1406	0	0	0	0	0	0	0	0	1	1	0	0	1	1	0	0	0	0	2	1	1	1	1	0	1	168	47	89	103	75.3867	0.76	0	1288	0	1288	0	1288	1288	0	0		1	1
4	81	481	55	1	0	27.3356	0	0	0	0	0	0	0	0	1	1	0	0	1	1	0	1	0	0	2	1	1	0	1	0	0	168	36	321	68	100.566	0.76	0	1046	0	1046	0	1046	1046	0	0		0.8	1
4	82	482	71	1	1	#NULL!	1	1	0	0	0	0	0	1	1	1	0	0	1	1	0	0	1	0	1	1	0	0	0	0	4	90	27	133	36	29.0607	3.52	0	1239	0	1239	0	1239	1239	0	0		2.2	1
4	83	483	59	0	1	27.7887	0	0	0	0	0	0	0	0	1	0	1	0	1	1	0	0	1	0	2	0	1	0	0	0	4	154	41	97	94	100.091	9.568	0	1296	0	1296	0	1296	1296	0	0		0.6	0
4	84	484	74	0	1	33.8143	0	0	1	0	0	0	0	0	1	0	1	0	1	1	0	1	0	0	2	3	0	0	1	0	0	132	37	182	59	72.8609	12.918	1	192	1	192	0	1394	1394	0	0		0.8	1
4	86	486	54	1	1	28.9827	1	0	0	0	0	0	0	0	1	1	1	0	1	0	0	1	0	0	1	2	1	1	1	0	1	243	41	350	132	84.9489	1.722	0	1001	0	1001	0	1001	1001	0	0		1	1
4	87	487	69	1	1	22.8625	0	0	1	0	0	0	1	0	1	1	1	1	1	1	0	0	0	0	1	1	1	0	1	0	0	128	46	53	71	91.1467	1.149	0	1032	0	1032	0	1032	1032	0	0		0.8	1
4	88	488	68	0	1	35.4297	0	0	1	0	0	0	0	0	1	1	1	0	1	1	0	1	0	0	2	3	0	0	1	0	0	163	52	85	94	75.9975	0.608	0	1032	0	1032	0	1032	1032	0	0		0.8	1
4	89	489	51	1	0	23.7649	0	0	1	0	0	0	0	1	0	1	1	0	1	1	0	1	0	1	2	3	0	1	1	0	1	103	24	235	32	86.7581	27.22	0	1337	0	1337	0	1337	1337	0	0		1	0
4	90	490	72	0	1	30.9711	0	0	0	0	0	0	0	0	1	1	0	0	1	1	0	1	0	0	2	1	1	0	1	0	0	130	47	56	72	64.0845	3.321	0	1103	0	1103	0	1103	1103	0	0		0.9	1
4	91	491	78	0	1	35.8377	1	0	1	0	1	0	0	0	1	1	1	0	1	0	1	1	0	1	1	2	1	1	1	0	1	136	40	177	61	39.3885	14.257	1	224	1	224	1	285	285	1	1	Heart failure	1.3	1
4	92	492	63	1	1	33.6328	0	0	1	0	0	0	0	0	1	1	1	0	1	1	0	1	0	0	2	3	0	1	1	0	1	168	47	115	98	79.7445	0.571	0	1114	0	1114	0	1114	1114	0	0		1	1
4	94	494	62	1	1	29.4531	1	0	1	0	0	1	0	1	1	1	1	1	1	1	0	1	1	0	1	2	0	0	1	0	4	135	44	100	71	95.7406	4.121	1	904	1	904	0	1272	1272	0	0		0.8	1
4	96	496	81	0	1	33.7778	0	0	1	0	0	0	0	0	1	1	0	0	1	0	1	0	0	0	1	1	1	0	1	0	0	122	44	92	60	60.1584	1.808	1	321	1	321	0	1332	1332	0	0		0.9	1
4	97	497	63	1	1	33.8566	0	0	1	0	0	0	0	0	1	1	1	0	1	1	0	0	0	1	1	1	1	0	1	0	0	187	55	132	106	79.7445	1.588	0	722	1	722	1	722	722	2	1	Unknown, the pacient had bladder cancer	1	1
4	98	498	56	1	1	30.1318	0	0	1	0	0	0	0	0	1	1	1	0	1	1	0	1	0	1	1	1	1	1	1	0	1	156	43	234	66	95.143	1.705	0	911	0	911	0	911	911	0	0		0.9	1
2	100	2100	65	0	1	23.74	0	0	0	0	0	0	0	0	1	1	0	0	1	0	0	1	0	0	1	1	1	0	1	0	0	177	57	92	102	77.616	0.31	0	810	0	810	0	810	810	0	0		0.8	1
2	101	2101	78	0	1	32.431	0	0	1	0	0	0	0	0	0	1	1	0	1	0	0	1	0	0	1	2	0	1	1	0	1	173	52	156	90	36.0129	16.629	0	812	0	812	0	812	812	0	0		1.4	0
2	103	2103	54	1	1	35.0032	1	0	1	0	0	0	0	0	0	1	0	0	0	0	0	1	1	1	1	0	1	0	0	0	4	169	53	81	100	75.7032	3.899	0	813	0	813	0	813	813	0	0		1.1	0
2	104	2104	69	1	1	28.3039	1	0	1	1	0	0	0	0	0	1	1	0	1	1	0	1	0	0	1	1	1	1	1	0	1	124	37	64	74	50.9012	6.263	0	815	0	815	0	815	815	0	0		1.4	0
2	105	2105	48	1	1	32.45	0	0	1	0	0	0	0	0	0	1	1	0	0	0	0	1	0	0	1	2	0	0	1	0	0	143	40	82	87	88.6058	5.973	0	1004	0	1004	0	1004	1004	0	0		1	0
2	106	2106	63	1	1	25.7117	0	0	0	1	0	0	0	0	0	1	1	0	1	0	0	1	0	0	1	1	1	1	1	0	1	156	45	68	97	79.7445	0.691	0	808	0	808	0	808	808	0	0		1	0
2	107	2107	56	1	1	#NULL!	1	0	1	0	0	0	0	0	0	1	0	0	0	0	0	1	0	0	1	0	1	0	0	0	4	162	47	105	94	105.496	0.754	0	815	0	815	0	815	815	0	0		0.7	0
2	108	2108	43	1	1	30.8248	0	0	0	0	0	0	0	0	0	1	0	0	1	1	0	1	0	0	2	0	1	0	0	0	4	166	44	100	102	104.241	1.026	0	1045	0	1045	0	1045	1045	0	0		0.9	0
2	109	2109	67	0	1	28.7619	0	0	1	0	0	0	0	0	0	1	1	0	1	0	0	1	0	0	1	2	1	1	1	0	1	132	45	80	71	76.5332	6.735	0	811	0	811	0	811	811	0	0		0.8	0
2	110	2110	55	0	1	27.1918	0	0	1	0	0	0	0	0	0	1	1	0	1	1	0	1	0	0	1	2	0	0	0	0	4	131	38	67	80	83.2643	0.477	0	791	0	791	0	791	791	0	0		0.8	0
2	112	2112	67	1	1	33.218	1	0	1	0	0	0	0	0	1	1	1	0	1	0	1	1	1	0	1	3	0	1	1	0	1	140	43	100	77	62.1968	7.044	0	808	0	808	0	808	808	0	0		1.2	1
2	113	2113	41	1	1	26.1224	1	1	0	0	0	0	0	1	0	1	1	0	1	0	0	1	0	1	2	1	0	1	1	0	1	178	35	189	105	93.0717	0.893	0	811	0	811	0	811	811	0	0		1	0
2	114	2114	72	1	1	24.8016	0	0	1	1	0	1	0	0	0	1	0	1	0	0	1	0	0	0	1	3	0	0	0	1	3	164	67	40	89	49.8397	11.233	0	811	0	811	0	811	811	0	0		1.4	0
2	115	2115	74	0	1	24.6097	0	0	1	0	0	0	0	0	0	0	0	1	1	0	0	1	0	0	1	0	1	0	0	0	4	180	46	174	99	63.1904	0.735	0	813	0	813	0	813	813	0	0		0.9	0
2	116	2116	61	1	1	32.5964	0	0	0	0	0	0	0	0	1	1	1	0	1	0	0	1	0	0	1	0	1	0	0	0	4	133	37	157	65	96.4155	1.913	0	816	0	816	0	816	816	0	0		0.8	1
2	118	2118	53	1	1	27.6095	0	0	0	0	0	0	0	0	0	1	0	0	1	0	0	0	0	0	1	1	1	0	1	0	0	158	51	114	84	97.1693	1.641	0	806	0	806	0	806	806	0	0		0.9	0
2	119	2119	55	1	1	30.7174	0	0	0	0	0	0	0	0	0	1	1	0	1	0	0	1	1	0	1	1	1	1	1	0	1	146	47	90	81	84.3543	0.527	0	806	0	806	0	806	806	0	0		1	0
2	120	2120	55	0	1	26.9531	0	0	1	0	0	0	0	0	1	1	1	0	1	0	1	1	0	0	1	0	1	0	0	0	4	232	57	164	142	46.2953	4.962	0	806	0	806	0	806	806	0	0		1.3	1
2	121	2121	52	1	1	34.6021	0	0	0	0	0	0	0	0	0	1	1	0	1	0	0	1	0	0	1	1	1	0	1	0	0	107	33	108	52	86.1508	0.777	0	806	0	806	0	806	806	0	0		1	0
2	122	2122	43	1	1	38.3474	0	0	1	0	0	0	0	0	1	1	0	0	1	1	0	1	0	0	2	1	1	0	1	0	0	117	31	68	72	82.6	7.555	0	799	0	799	0	799	799	0	0		0.9	1
2	123	2123	56	1	1	31.5886	1	0	1	0	0	0	0	0	1	1	1	0	1	1	0	1	0	0	2	1	1	1	1	0	1	156	43	134	86	83.7638	2.112	0	799	0	799	0	799	799	0	0		1	1
2	124	2124	74	0	1	34.9636	0	0	1	0	0	0	0	0	0	1	1	0	1	1	0	1	0	0	1	1	1	1	1	0	1	212	62	95	131	55.6327	1.254	0	765	0	765	0	765	765	0	0		1	0
2	125	2125	58	1	1	29.0533	0	0	0	0	0	0	0	0	0	1	1	0	1	0	0	0	0	1	1	2	0	0	1	0	0	145	35	99	90	98.4689	4.639	0	771	0	771	0	771	771	0	0		0.8	0
2	126	2126	74	1	1	28.0816	1	0	1	0	0	1	0	0	0	1	0	0	0	0	1	1	1	1	1	1	1	1	1	0	1	142	35	99	87	88.0009	4.695	0	783	0	783	0	783	783	0	0		0.8	0
2	127	2127	84	0	1	25.0657	0	0	1	0	0	0	0	0	1	1	1	0	1	0	0	1	1	0	1	#NULL!		0	0	0	4	163	53	77	95	41.5999	1.261	1	597	1	597	0	799	799	0	0		1.2	1
2	128	2128	53	1	1	28.3848	0	0	1	0	0	0	0	0	0	1	1	0	1	0	0	1	0	0	1	1	1	0	1	0	2	157	57	146	71	85.5477	2.111	0	786	0	786	0	786	786	0	0		1	0
2	129	2129	74	0	1	21.6441	1	0	1	0	0	0	0	0	1	1	1	0	1	1	0	1	1	0	1	3	0	1	1	0	1	152	54	73	83	85.6262	0.843	0	776	0	776	0	776	776	0	0		0.7	1
2	130	2130	51	1	1	28.9062	0	0	0	0	0	0	0	1	0	1	1	0	1	1	0	1	0	0	2	1	1	1	1	0	1	155	47	116	85	98.5441	3.153	0	762	0	762	0	762	762	0	0		0.9	0
2	131	2131	47	1	1	26.5285	0	0	0	0	0	0	0	0	1	1	1	0	1	1	0	1	0	0	2	1	1	0	1	0	0	160	57	77	88	79.5187	1.167	0	783	0	783	0	783	783	0	0		1.1	1
2	132	2132	48	0	1	30.3673	0	0	1	0	0	0	0	0	0	1	0	0	0	1	0	0	0	0	1	0	1	0	0	0	4	186	92	102	74	75.8526	3.915	0	783	0	783	0	783	783	0	0		0.9	0
2	134	2134	67	1	1	32.2708	0	0	0	0	0	0	0	0	1	1	1	0	1	0	0	1	0	0	2	1	1	0	1	0	0	121	40	67	68	69.0962	4.603	0	774	0	774	0	774	774	0	0		1.1	1
2	135	2135	82	0	1	30.1769	0	0	1	0	0	0	1	0	1	1	1	1	0	1	0	0	1	1	1	1	1	1	1	0	1	171	57	67	101	38.2972	5.125	0	601	1	601	1	601	601	1	1	Heart failure	1.3	1
2	136	2136	79	1	1	26.5625	0	0	0	0	0	0	1	1	1	1	0	1	1	0	0	1	0	1	2	1	1	0	1	0	0	135	45	77	75	40.3746	1.91	0	760	0	760	0	760	760	0	0		1.6	1
2	137	2137	38	1	1	23.9869	0	1	0	0	0	0	0	0	1	1	0	0	1	1	0	1	0	0	2	1	1	0	1	0	0	216	57	184	122	107.967	4.831	0	760	0	760	0	760	760	0	0		0.9	1
2	138	2138	71	1	1	25.8586	0	0	1	0	0	0	0	0	1	1	1	0	1	0	0	1	0	0	1	1	1	0	1	0	0	140	55	102	65	67.1817	1.096	0	767	0	767	0	767	767	0	0		1.1	1
2	139	2139	40	1	1	30.4834	0	0	0	0	0	0	0	0	1	0	1	0	1	0	0	1	0	0	1	2	0	0	1	0	0	158	33	239	77	75.1862	1.158	0	771	0	771	0	771	771	0	0		1.2	1
2	140	2140	53	1	1	28.5467	0	0	0	0	0	0	0	0	1	1	0	0	1	0	0	1	0	0	2	1	1	0	1	0	0	164	33	86	114	85.5477	1.289	0	687	0	687	0	687	687	0	0		1	1
2	141	2141	69	1	1	23.8144	0	0	1	0	0	1	0	0	1	1	0	0	0	1	0	0	0	0	1	1	1	0	0	1	3	144	54	136	63	86.8395	1.788	0	984	1	295	1	295	984	0	0		0.9	1
2	142	2142	59	1	1	29.4029	0	0	1	0	0	0	0	0	1	1	0	0	1	1	0	1	0	0	1	2	1	1	1	0	1	176	62	121	90	73.0904	1.553	0	758	0	758	0	758	758	0	0		1.1	1
2	144	2144	48	1	1	29.8211	1	0	1	0	0	0	0	0	1	1	1	0	1	1	0	1	0	0	2	2	1	1	1	0	1	175	36	337	72	88.6058	6.029	0	765	0	765	0	765	765	0	0		1	1
2	145	2145	36	1	0	22.6644	0	0	0	0	0	0	0	0	0	1	0	0	1	1	0	1	1	0	1	1	0	0	0	0	4	103	29	54	63	96.3987	0.284	0	757	0	757	0	757	757	0	0		1	0
2	146	2146	51	0	1	32.3884	0	0	1	0	0	0	0	0	1	1	1	0	1	0	0	1	0	0	1	0	1	0	0	0	4	132	44	71	74	105.877	2.368	0	763	0	763	0	763	763	0	0		0.6	1
2	147	2147	49	0	1	24.6914	0	0	0	0	0	0	0	0	0	1	1	0	1	0	0	1	0	0	2	1	1	0	1	0	0	169	44	116	102	102.065	64.124	0	764	0	764	0	764	764	0	0		0.7	0
2	148	2148	57	1	1	28.5627	0	0	0	1	0	0	0	0	1	1	1	0	1	0	0	0	0	0	1	3	0	1	1	0	1	115	30	80	69	99.1631	3.222	0	771	0	771	0	771	771	0	0		0.8	1
2	149	2149	49	1	1	29.1349	1	0	0	0	0	0	0	0	1	1	1	0	1	0	0	0	0	0	1	1	1	1	1	0	4	117	31	89	68	99.9384	0.616	0	762	0	762	0	762	762	0	0		0.9	1
2	150	2150	67	1	1	28.5156	0	0	1	0	0	0	0	0	1	0	1	1	1	0	0	1	0	0	1	1	0	0	0	0	4	168	42	93	107	62.1968	0.469	0	700	0	700	0	700	700	0	0		1.2	0
2	151	2151	64	1	1	24.4898	0	0	1	1	0	1	0	0	1	0	1	0	1	0	0	1	1	0	1	3	0	1	1	0	1	161	46	124	90	89.9438	3.872	0	705	0	705	0	705	705	0	0		0.9	1
2	152	2152	60	1	1	37.6953	0	0	0	0	0	1	0	0	1	1	0	0	1	1	0	0	0	0	1	2	0	0	0	1	3	154	43	132	85	81.4429	10.257	0	703	0	703	0	703	703	0	0		1	1
2	153	2153	67	1	1	24.4261	0	0	1	0	0	0	0	0	0	0	1	0	0	0	0	0	1	0	1	0	1	0	0	0	4	129	53	71	62	77.535	1.543	1	320	1	320	0	700	700	0	0		1	0
2	154	2154	42	1	1	30.3019	1	0	0	0	0	0	0	0	0	1	1	0	1	0	0	1	0	0	2	1	1	1	1	0	1	156	41	116	92	104.975	2.569	0	735	0	735	0	735	735	0	0		0.9	0
2	155	2155	63	1	1	30.8594	1	0	1	0	0	0	0	0	0	1	1	0	0	1	0	1	1	0	1	1	1	1	1	0	1	107	31	115	53	90.5778	0.594	0	741	0	741	0	741	741	0	0		0.9	0
2	156	2156	39	1	1	28.8927	0	0	0	0	0	0	0	0	0	1	1	0	1	0	0	1	0	0	2	1	1	0	1	0	0	136	38	134	71	107.211	10.406	0	742	0	742	0	742	742	0	0		0.9	0
2	157	2157	54	1	1	27.3356	0	1	1	0	0	0	0	0	0	1	0	0	1	0	0	0	1	0	1	2	1	0	1	0	0	276	55	178	185	68.144	2.031	1	77	1	77	0	743	743	0	0		1.2	0
2	158	2158	49	1	1	29.7442	0	1	0	0	0	0	0	0	1	1	1	0	1	0	0	1	0	0	2	1	0	0	0	0	4	152	38	131	88	99.9384	1.82	0	738	0	738	0	738	738	0	0		0.9	1
2	159	2159	55	1	1	20.6174	0	0	1	1	0	1	0	1	1	0	1	0	1	0	0	1	0	0	2	2	0	0	0	1	3	178	37	164	108	61.4256	24.535	0	729	0	729	0	729	729	0	0		1.3	1
2	161	2161	64	1	0	31.2213	1	0	1	0	0	1	0	0	1	1	0	0	1	1	0	0	0	0	1	1	0	0	0	1	0	134	40	120	70	89.9438	1.747	0	735	0	735	0	735	735	0	0		0.9	1
2	162	2162	50	1	1	29.5858	0	0	0	0	0	0	0	0	0	1	1	0	1	0	0	1	0	0	1	2	1	1	1	0	1	141	42	84	82	70.0859	1.037	0	742	0	742	0	742	742	0	0		1.2	0
2	164	2164	56	1	1	29.7004	0	0	1	0	0	0	0	0	1	1	1	0	1	1	0	1	0	0	1	0	1	0	0	0	4	154	40	161	82	74.647	0.925	0	1337	0	1337	0	1337	1337	0	0		1.1	1
2	165	2165	61	1	1	23.2072	0	0	1	0	0	0	0	0	0	1	1	0	1	0	0	1	0	0	1	3	1	1	1	0	1	157	58	57	88	58.8905	5.506	0	736	0	736	0	736	736	0	0		1.3	0
2	166	2166	35	1	1	30.1847	0	1	0	0	0	0	0	0	1	1	1	0	1	0	0	1	0	0	1	0	1	0	0	0	4	168	32	175	101	97.0783	1.807	0	733	0	733	0	733	733	0	0		1	1
2	167	2167	77	1	1	25.5859	0	0	1	0	0	0	0	0	0	1	1	0	1	0	0	0	0	1	1	#NULL!		0	0	0	4	189	63	67	113	64.409	7.956	0	727	0	727	0	727	727	0	0		1.1	0
2	168	2168	56	1	1	27.0416	0	0	0	0	0	0	0	0	1	1	1	0	1	1	0	1	0	0	2	1	1	1	1	0	1	187	41	158	114	95.143	3.111	0	727	0	727	0	727	727	0	0		0.9	1
2	169	2169	72	0	1	40.999	1	0	1	0	0	0	0	0	1	1	0	0	1	1	0	0	1	0	1	0	1	0	0	0	4	291	71	145	191	73.8918	1.628	1	341	1	341	0	341	341	0	0		0.8	1
2	170	2170	81	0	1	27.5312	1	0	1	0	0	0	0	0	0	1	1	0	1	0	0	0	1	0	1	#NULL!		0	0	0	4	136	37	171	65	69.3648	2.188	0	733	0	733	0	733	733	0	0		0.8	0
2	171	2171	73	1	1	31.25	0	0	1	0	0	0	0	0	1	1	0	0	1	1	0	1	0	0	1	0	1	0	0	0	4	146	42	69	90	74.335	9.427	0	678	0	678	0	678	678	0	0		1	1
2	172	2172	72	1	1	27.6817	1	0	0	0	0	0	0	0	1	1	1	0	1	1	0	0	0	0	1	1	0	1	1	0	1	128	45	81	67	85.0286	5.865	0	722	0	722	0	722	722	0	0		0.9	1
2	174	2174	71	0	1	29.865	1	0	1	0	0	0	0	0	0	1	1	0	1	0	1	1	0	0	2	1	1	1	1	0	1	149	48	97	82	56.8176	0.626	0	708	0	708	0	708	708	0	0		1	0
2	175	2175	65	1	1	24.5065	0	0	1	0	0	0	0	0	1	1	1	0	1	1	0	1	0	1	2	3	0	0	1	0	0	214	43	299	111	57.2588	3.707	0	713	0	713	0	713	713	0	0		1.3	1
2	176	2176	43	1	1	34.8161	0	0	1	0	1	0	0	0	1	1	1	0	1	0	0	0	1	0	1	1	1	1	1	0	1	161	47	139	86	104.241	10.927	0	719	0	719	0	719	719	0	0		0.9	1
2	177	2177	29	1	1	26.6436	0	1	0	0	0	0	0	0	1	1	0	0	1	1	0	1	0	0	2	2	0	1	1	0	1	280	50	90	212	115.013	3.281	0	180	0	180	0	180	180	0	0		0.9	1
2	178	2178	58	1	1	30.4878	0	0	0	0	0	0	0	0	0	1	1	0	1	0	0	1	0	0	1	1	1	1	1	0	1	121	37	59	72	98.4689	1.956	0	677	0	677	0	677	677	0	0		0.8	0
2	179	2179	59	1	1	27.9904	0	0	1	0	0	0	0	1	1	1	1	0	1	0	1	1	0	1	2	2	0	1	1	0	1	90	27	85	46	82.017	32.791	0	664	0	664	0	664	664	0	0		1	1
2	180	2180	57	1	1	33.0579	1	0	1	0	0	1	0	0	1	1	0	1	1	1	0	0	1	0	1	3	0	0	0	1	3	154	44	78	94	66.723	0.821	0	660	0	660	0	660	660	0	0		1.2	1
2	181	2181	57	1	1	27.5482	0	0	1	0	0	0	0	1	0	1	1	0	1	1	0	1	1	0	1	2	0	0	0	0	4	174	33	188	103	55.3779	28.664	0	689	0	689	0	689	689	0	0		1.4	0
2	182	2182	82	0	1	21.2279	0	0	1	0	0	0	0	0	0	1	0	0	0	1	0	1	0	0	1	#NULL!		0	0	0	4	195	49	90	128	42.1885	16.895	0	688	0	688	0	688	688	0	0		1.2	0
2	184	2184	48	0	1	28	1	0	1	0	0	0	0	0	0	1	1	0	1	1	0	1	1	0	1	3	0	1	0	0	1	145	42	159	71	75.8526	6.408	0	687	0	687	0	687	687	0	0		0.9	0
2	185	2185	50	1	1	25.3069	0	0	1	0	0	0	0	0	0	1	1	0	1	1	0	1	0	0	2	3	0	1	1	0	1	158	35	200	83	77.8605	2.239	0	667	0	667	0	667	667	0	0		1.1	0
2	186	2186	68	0	1	23.3844	1	0	1	0	0	0	0	0	1	1	1	0	1	1	0	1	1	0	1	1	0	1	1	0	1	152	47	79	89	75.9975	0.302	0	665	0	665	0	665	665	0	0		0.8	1
2	187	2187	75	1	1	19.9432	1	0	1	0	0	0	0	0	1	1	1	0	1	1	0	1	1	0	1	1	0	1	1	0	1	186	50	119	112	73.298	0.485	0	664	0	664	0	664	664	0	0		1	1
2	188	2188	60	0	1	28.4444	1	0	1	0	0	0	0	1	1	1	0	0	0	0	0	1	1	1	2	3	0	0	0	0	4	105	42	116	40	32.3168	4.229	0	368	1	95	1	95	368	1	1	SUDDEN DEATH	1.7	1
2	189	2189	48	1	1	29.7458	0	0	0	0	0	0	0	0	1	1	1	0	1	0	0	1	0	0	2	1	1	0	1	0	0	139	36	147	74	71.0775	0.543	0	665	0	665	0	665	665	0	0		1.2	1
2	190	2190	72	1	1	26.6436	0	0	0	0	0	0	0	0	1	0	0	1	1	0	0	1	0	0	2	0	1	0	0	0	4	122	35	161	55	66.7115	1.908	0	664	0	664	0	664	664	0	0		1.1	1
2	191	2191	82	1	1	23.4375	0	0	1	0	0	0	0	1	1	1	0	0	1	0	1	0	1	0	1	2	0	0	1	0	0	160	59	150	71	42.7408	1.701	0	667	0	667	0	667	667	0	0		1.5	1
2	192	2192	67	1	1	29.2388	0	0	0	0	0	0	0	0	1	0	0	0	1	0	0	0	0	0	1	0	1	0	0	0	4	101	32	119	45	62.1968	0.895	0	660	0	660	0	660	660	0	0		1.2	1
2	193	2193	56	0	1	26.6991	0	0	0	0	0	0	0	0	1	1	1	0	1	0	0	1	0	0	1	1	1	1	1	0	1	169	47	109	100	82.6815	3.049	0	667	0	667	0	667	667	0	0		0.8	1
2	194	2194	71	1	1	26.4721	0	0	1	0	0	0	1	0	1	1	1	0	1	0	0	1	0	0	2	2	0	0	1	0	0	113	31	93	63	50.191	1.876	0	666	0	666	0	666	666	0	0		1.4	1
2	195	2195	58	0	1	24.3865	0	0	1	0	0	0	0	1	1	1	1	0	1	1	0	1	0	0	2	1	0	1	1	0	1	176	57	82	103	95.8118	1.143	0	660	0	660	0	660	660	0	0		0.7	1
2	196	2196	64	1	1	28.699	0	0	1	0	0	0	0	0	1	1	1	0	1	0	0	1	0	0	1	2	0	0	1	0	2	179	40	148	109	89.9438	2.264	0	810	0	810	0	810	810	0	0		0.9	1
2	197	2197	61	1	1	28.1969	0	0	1	0	0	0	0	0	0	1	1	0	1	1	0	1	0	0	1	1	0	0	1	0	0	123	40	82	67	91.8593	2.534	0	667	0	667	0	667	667	0	0		0.9	0
2	198	2198	66	1	1	34.209	0	0	1	0	0	1	0	0	1	1	0	1	1	0	0	1	0	1	1	3	0	0	0	1	3	223	61	108	140	93.0879	7.293	1	954	1	954	0	1002	1002	0	0		0.8	1
2	199	2199	71	0	1	23.3067	0	1	1	0	0	0	0	0	0	1	1	0	1	1	0	1	0	0	1	1	1	1	0	0	1	112	28	93	65	105.128	11.744	0	302	0	302	0	302	302	0	0		0.4	0
2	200	2200	55	1	1	29.0318	0	0	0	0	0	0	0	0	1	1	1	0	0	1	0	1	1	0	2	2	0	0	1	0	0	156	44	87	95	75.1732	1.125	0	671	0	671	0	671	671	0	0		1.1	1
2	201	2201	69	0	1	29.9688	0	0	1	0	0	0	0	0	1	1	1	0	1	0	1	1	0	0	2	1	1	0	1	0	0	144	49	61	83	88.6871	2.266	0	728	0	728	0	728	728	0	0		0.7	1
2	202	2202	85	1	1	25.5937	1	0	0	0	0	0	0	0	0	1	1	0	1	0	0	1	1	0	1	3	0	1	1	0	1	99	38	63	48	54.8093	0.752	0	546	0	546	0	546	546	0	0		1.2	0
2	203	2203	51	1	1	34.5168	0	0	0	0	0	0	0	0	0	1	0	0	1	0	0	1	1	0	1	1	1	0	1	0	0	176	38	271	84	86.7581	4.548	0	569	0	569	0	569	569	0	0		1	0
2	204	2204	75	1	1	#NULL!	0	0	1	0	0	1	1	0	0	1	0	1	1	1	1	1	1	0	1	2	0	0	0	1	3	124	26	375	23	28.2555	8.024	0	762	1	134	1	134	762	0	0		2.2	0
2	205	2205	53	1	1	28.0664	0	0	1	0	0	0	0	0	0	1	0	0	1	1	0	1	0	0	2	2	1	1	1	0	1	154	42	89	94	76.2368	7.061	0	567	0	567	0	567	567	0	0		1.1	0
2	206	2206	59	1	1	24.7721	0	0	1	0	0	0	0	0	1	1	1	0	1	0	0	1	0	0	1	1	1	1	1	0	1	117	38	60	67	73.0904	0.27	0	579	0	579	0	579	579	0	0		1.1	1
2	207	2207	59	0	1	36.0519	1	0	1	0	0	0	0	0	0	1	1	0	1	0	0	1	0	0	1	1	1	1	1	0	1	160	49	141	83	80.9573	0.702	0	730	0	730	0	730	730	0	0		0.8	0
2	208	2208	72	1	1	25.4327	1	0	1	0	0	0	0	1	1	1	1	0	1	0	0	1	1	0	1	1	1	1	1	0	1	118	34	113	61	45.8511	3.11	0	547	0	547	0	547	547	0	0		1.5	1
2	210	2210	45	1	1	28.4053	0	1	1	0	0	0	0	0	0	1	1	0	1	1	0	1	0	0	1	2	0	0	1	0	0	131	37	137	67	80.6438	0.472	0	548	0	548	0	548	548	0	0		1.1	0
2	211	2211	56	1	1	29.2421	0	0	1	0	0	0	0	0	0	1	1	0	1	1	0	1	0	0	1	1	1	1	1	0	1	119	43	60	64	83.7638	0.972	0	550	0	550	0	550	550	0	0		1	0
2	212	2212	56	1	1	22.5309	0	0	1	0	0	1	0	0	1	1	0	0	1	1	0	0	0	1	1	3	1	0	0	1	4	155	66	108	67	83.7638	2.005	0	550	0	550	0	550	550	0	0		1	1
2	213	2213	48	1	1	27.3797	1	0	0	0	0	0	0	0	0	1	1	0	1	1	0	1	0	0	2	2	1	1	1	0	1	173	37	137	109	100.643	9.928	0	539	0	539	0	539	539	0	0		0.9	0
2	214	2214	48	0	1	23.7253	0	0	1	0	0	0	0	0	0	1	1	0	1	1	0	0	0	0	2	2	1	1	1	0	1	156	66	58	78	75.8526	0.569	0	570	0	570	0	570	570	0	0		0.9	0
2	215	2215	75	0	1	#NULL!	0	0	1	0	0	0	0	0	0	0	1	1	1	1	0	1	1	1	1	1	0	0	0	0	4	229	82	120	123	89.4503	6.099	0	555	1	555	1	104	555	0	0		0.6	0
2	216	2216	63	1	1	28.6501	0	0	1	0	0	0	0	0	1	1	1	0	1	1	0	0	0	0	1	1	1	1	1	0	1	130	37	162	61	90.5778	3.036	0	573	0	573	0	573	573	0	0		0.9	1
2	217	2217	56	1	1	32.526	1	0	1	0	0	0	0	0	1	1	1	0	1	0	0	1	1	0	1	2	0	0	0	0	4	138	42	149	66	105.496	0.84	0	588	0	588	0	588	588	0	0		0.7	1
2	218	2218	51	1	1	32.912	0	0	1	0	0	0	0	0	0	1	0	0	1	1	0	1	0	0	1	1	1	1	1	0	1	176	46	420	46	98.5441	6.835	0	272	0	272	0	272	272	0	0		0.9	0
2	219	2219	47	1	1	19.8177	0	1	0	0	0	0	0	0	0	1	1	0	1	0	0	1	0	0	1	0	1	0	0	0	4	113	55	55	47	103.153	0.16	0	519	0	519	0	519	519	0	0		1	0
2	220	2220	71	1	1	27.1111	1	0	1	0	0	0	0	0	0	1	1	0	1	0	0	1	0	0	1	1	1	1	1	1	1	135	33	181	66	85.628	2.802	0	524	0	524	0	524	524	0	0		0.9	0
2	221	2221	60	1	1	27.6817	0	0	1	0	0	0	0	0	1	1	1	0	1	1	0	1	0	0	1	1	1	1	1	0	1	127	38	108	67	92.5069	0.72	0	524	0	524	0	524	524	0	0		0.9	1
2	222	2222	42	1	1	30.8463	0	0	0	0	0	0	0	1	1	1	1	0	0	1	0	0	0	0	2	2	0	0	0	0	4	171	43	84	111	82.3613	1.286	0	523	0	523	0	523	523	0	0		1.1	1
2	223	2223	49	0	1	#NULL!	0	0	1	0	0	0	0	0	1	1	1	0	1	1	0	1	0	0	1	1	1	1	1	0	1	186	36	541	42	86.8487	4.403	0	526	0	526	0	526	526	0	0		0.8	1
2	224	2224	54	1	1	32.872	0	0	1	0	0	0	0	0	0	1	1	0	1	1	0	1	0	0	1	1	0	0	0	0	4	116	37	87	62	68.144	1.384	0	525	0	525	0	525	525	0	0		1.2	0
2	225	2225	62	0	1	26.2976	1	0	1	0	0	0	0	0	1	1	1	0	1	0	0	0	0	0	1	1	1	0	1	0	2	203	42	167	128	93.1571	4.451	0	524	0	524	0	524	524	0	0		0.7	1
2	226	2226	62	1	1	30.7599	0	0	1	0	0	0	0	0	1	1	0	0	1	1	0	1	0	0	1	2	1	0	1	0	0	163	34	149	99	91.2163	5.857	0	524	0	524	0	524	524	0	0		0.9	1
2	227	2227	57	1	1	32.1799	1	0	1	0	0	0	0	0	0	1	0	0	1	0	0	1	1	1	2	1	1	1	1	0	1	161	40	197	82	40.8678	4.421	0	160	0	160	0	160	160	0	0		1.8	0
2	228	2228	60	1	1	22.0932	0	0	1	0	0	0	0	0	0	1	1	0	1	1	0	1	0	0	2	2	1	1	1	0	1	173	42	98	111	72.5787	1.501	0	521	0	521	0	521	521	0	0		1.1	0
2	230	2230	73	0	1	34.1598	1	0	1	0	0	0	0	0	1	1	0	0	1	0	0	1	0	0	1	1	0	0	0	0	4	149	37	213	69	56.0249	37.541	0	520	0	520	0	520	520	0	0		1	1
2	231	2231	56	1	1	22.3094	0	0	1	0	0	0	0	0	1	1	1	0	1	1	0	1	0	0	2	0	1	0	0	0	4	169	46	105	102	67.1933	0.821	0	522	0	522	0	522	522	0	0		1.2	1
2	232	2232	45	1	1	25.8264	0	0	0	0	0	0	0	0	1	1	0	0	1	0	0	1	1	0	1	1	0	0	0	0	4	154	43	84	94	90.4929	4.066	0	529	0	529	0	529	529	0	0		1	1
2	233	2233	82	1	1	28.8889	1	0	1	0	0	0	0	1	0	1	1	0	0	1	0	0	0	0	2	1	0	1	1	0	1	176	51	71	111	83.1919	3.28	0	505	0	505	0	505	505	0	0		0.8	0
2	234	2234	40	1	1	28.0277	0	0	0	0	0	0	0	0	1	1	1	0	1	0	0	0	0	0	2	1	1	1	1	0	1	141	33	248	58	106.461	1.025	0	504	0	504	0	504	504	0	0		0.9	1
2	235	2235	73	1	#NULL!	26.5338	0	0	1	0	0	1	0	0	0	1	0	0	1	0	0	1	0	0	1	3	0	0	0	1	3	176	60	120	92	59.6298	1.096	0	449	0	449	0	449	449	0	0		1.2	0
2	236	2236	57	0	1	31.9805	0	0	1	0	0	0	0	0	0	1	0	0	0	0	0	1	0	0	1	1	1	1	1	0	1	161	46	171	81	82.1027	5.435	0	594	0	594	0	594	594	0	0		0.8	0
2	237	2237	69	0	1	29.3848	0	0	1	0	0	1	0	0	0	1	0	0	1	0	0	1	0	0	1	2	1	0	0	1	3	183	47	165	103	46.2226	4.032	0	510	0	510	0	510	510	0	0		1.2	0
2	238	2238	84	0	1	23.5556	0	0	1	0	0	0	0	0	0	1	1	0	0	0	0	1	1	1	1	#NULL!		0	0	0	4	194	50	132	118	58.9039	1.209	0	504	0	504	0	504	504	0	0		0.9	0
2	239	2239	58	0	1	30.0914	0	0	0	0	0	0	0	0	1	1	1	0	0	1	0	1	0	0	1	2	1	1	1	0	1	184	52	197	93	55.4752	2.357	0	470	0	470	0	470	470	0	0		1.1	1
2	240	2240	55	1	1	27.2173	0	0	0	0	0	0	0	0	1	1	1	0	1	1	0	1	1	0	2	2	0	1	1	0	1	171	52	79	103	67.667	3.428	0	453	0	453	0	453	453	0	0		1.2	1
2	241	2241	49	0	1	20.9566	0	0	0	0	0	0	0	0	1	1	1	0	1	0	0	0	0	0	2	1	1	1	1	0	1	141	41	70	86	102.065	0.378	0	491	0	491	0	491	491	0	0		0.7	1
2	243	2243	64	1	1	23.8754	1	0	1	0	0	1	0	1	0	1	0	1	1	1	0	1	0	1	1	3	0	0	0	1	3	174	39	145	106	63.5214	2.492	0	509	0	509	0	509	509	0	0		1.2	0
2	244	2244	48	1	1	29.4078	0	0	0	0	0	0	0	0	1	1	1	0	1	0	0	1	0	0	2	2	1	1	1	0	1	128	35	116	70	100.643	2.218	0	491	0	491	0	491	491	0	0		0.9	1
2	246	2246	42	1	1	34.9481	0	0	1	0	0	1	0	0	0	1	0	0	1	0	0	1	0	0	1	2	1	0	0	1	3	151	33	163	85	92.4202	1.029	0	497	0	497	0	497	497	0	0		1	0
2	248	2248	60	1	1	30.1038	0	0	0	0	0	0	0	0	0	1	1	0	1	0	0	1	0	1	2	2	1	1	1	0	1	148	37	137	84	54.2231	0.383	0	613	0	613	0	613	613	0	0		1.4	0
2	249	2249	45	0	1	33.7925	0	0	1	0	0	0	0	0	0	1	1	0	1	1	0	0	0	0	2	1	1	1	1	0	1	161	51	197	71	77.4681	4.739	0	612	0	612	0	612	612	0	0		0.9	0
2	250	2250	50	0	1	28.4444	0	0	0	0	0	0	0	1	0	1	0	0	1	1	0	1	0	0	1	1	1	1	1	0	1	119	41	83	61	86.2408	0.623	0	314	0	314	0	314	314	0	0		0.8	0
2	251	2251	52	0	1	24.0882	0	0	1	0	0	0	0	0	1	1	1	0	1	1	0	0	0	0	2	1	1	1	1	0	1	179	61	53	107	85.0376	0.674	0	146	0	146	0	146	146	0	0		0.8	1
2	252	2252	49	0	1	34.1542	1	0	0	0	0	0	0	0	0	1	1	0	1	0	0	1	0	0	1	1	1	1	1	0	1	165	45	191	82	102.065	3.373	0	492	0	492	0	492	492	0	0		0.7	0
2	254	2254	62	1	1	27.0993	0	0	0	0	0	0	0	1	1	1	1	0	0	0	0	1	0	0	2	1	1	1	1	0	1	196	51	97	126	64.4201	4.315	0	443	0	443	0	443	443	0	0		1.2	1
2	255	2255	65	1	1	23.7118	0	0	0	0	0	0	0	0	1	1	1	0	1	1	0	0	0	0	2	2	1	0	1	0	0	155	46	90	91	78.632	3.374	0	419	0	419	0	419	419	0	0		1	1
2	257	2257	42	1	1	39.5062	0	0	1	0	0	0	0	0	0	1	1	0	1	1	0	1	0	0	1	1	1	0	1	0	0	171	46	113	102	92.4202	1.362	0	450	0	450	0	450	450	0	0		1	0
2	258	2258	75	1	1	31.9838	0	0	1	0	0	0	1	0	0	1	0	1	1	0	1	0	0	1	1	0	1	0	0	0	4	101	37	132	38	73.298	3.807	0	457	0	457	0	457	457	0	0		1	0
2	260	2260	58	1	1	28.8754	0	0	0	0	0	0	0	0	0	1	0	0	1	1	0	1	0	0	2	2	0	1	1	0	1	148	42	100	86	73.6056	0.909	0	266	0	266	0	266	266	0	0		1.1	0
2	261	2261	49	1	1	40.4844	0	1	0	0	0	0	0	0	1	1	1	0	1	1	0	1	0	0	1	1	1	0	1	0	0	233	38	508	93	78.4093	5.512	0	454	0	454	0	454	454	0	0		1.1	1
2	263	2263	54	1	1	30.0408	0	0	1	0	0	0	0	0	0	1	0	0	1	0	0	0	0	0	1	2	1	1	1	0	1	129	44	135	58	84.9489	0.811	0	267	0	267	0	267	267	0	0		1	0
2	264	2264	48	1	1	35.9184	0	0	0	0	0	0	0	0	1	1	0	0	1	1	0	1	1	1	1	#NULL!	0	0	0	0	4	133	38	88	77	64.5215	0.797	0	408	0	408	0	408	408	0	0		1.3	1
2	266	2266	54	1	1	39.5484	0	0	1	0	0	1	0	0	1	1	0	0	0	0	0	0	0	0	2	2	1	0	0	1	3	163	46	243	68	56.5573	14.672	0	411	0	411	0	411	411	0	0		1.4	0
2	267	2267	41	1	1	28.4055	0	0	1	0	0	0	0	0	1	1	1	0	1	1	0	1	0	0	2	1	1	0	1	0	0	154	28	177	91	82.9419	5.025	0	576	0	576	0	576	576	0	0		1.1	1
2	268	2268	55	1	1	28.6048	0	0	0	0	0	0	0	0	1	0	1	0	1	0	1	1	0	0	1	1	1	1	1	0	1	171	38	106	112	95.8137	3.391	0	420	0	420	0	420	420	0	0		0.9	1
2	269	2269	49	1	1	31.935	0	0	0	0	0	0	0	0	0	1	1	0	1	0	0	1	0	0	1	1	1	1	1	0	1	140	48	103	71	99.9384	1.637	0	419	0	419	0	419	419	0	0		0.9	0
2	270	2270	54	1	1	30.6554	0	0	0	0	0	0	0	0	0	1	1	0	1	1	0	1	0	0	1	1	1	1	1	0	1	130	40	90	72	84.9489	2.304	0	547	0	547	0	547	547	0	0		1	0
2	271	2271	58	1	0	24.977	0	0	0	0	0	0	0	0	0	1	0	0	1	0	0	1	0	0	2	1	1	0	1	0	0	158	43	64	102	95.4824	1.48	0	284	0	284	0	284	284	0	0		1	0
2	274	2274	51	1	1	26.8136	1	1	1	0	0	0	0	0	1	1	1	0	0	1	0	0	1	0	1	1	1	1	1	0	1	124	30	147	65	103.432	4.815	0	419	0	419	0	419	419	0	0		0.8	1
2	275	2275	54	1	1	29.0659	0	0	0	0	0	0	0	0	0	1	1	0	1	1	0	1	1	0	1	1	1	0	1	0	0	125	40	105	64	68.144	1.278	0	531	0	531	0	531	531	0	0		1.2	0
2	276	2276	54	1	1	23.8087	0	0	1	0	0	0	0	0	0	1	1	0	1	0	0	1	0	0	2	2	0	1	1	0	1	127	40	52	77	84.9489	1.295	0	388	0	388	0	388	388	0	0		1	0
2	277	2277	58	1	1	30.4218	0	0	0	0	0	0	0	0	0	1	1	0	1	1	0	1	0	0	2	2	1	1	1	0	1	135	40	97	76	82.5952	0.473	0	414	0	414	0	414	414	0	0		1	0
2	278	2278	58	1	1	32.8742	1	0	0	0	0	0	0	0	0	1	0	0	1	0	0	1	1	0	1	0	1	0	0	0	4	148	38	85	93	82.5952	2.394	0	550	0	550	0	550	550	0	0		1	0
2	279	2279	60	1	1	41.0973	1	0	1	0	0	0	0	0	0	1	1	0	1	1	0	1	0	0	1	2	1	0	1	0	0	117	32	112	63	72.5787	5.649	1	159	1	159	0	428	428	0	0		1.1	0
2	280	2280	58	1	1	23.9158	0	0	1	0	0	0	0	0	0	1	0	0	1	1	0	1	1	0	1	#NULL!		0	0	0	4	126	36	245	41	82.5952	0.312	0	287	0	287	0	287	287	0	0		1	0
2	281	2281	67	1	1	#NULL!	1	0	1	1	0	1	0	1	0	1	1	0	0	1	0	1	0	0	1	2	0	0	0	1	3	149	37	240	64	51.6213	2.094	0	414	0	414	0	414	414	0	0		1.4	0
2	282	2282	67	1	1	32.45	1	0	1	0	0	1	0	0	0	1	0	1	1	0	0	0	0	0	1	1	1	1	1	0	1	114	34	93	61	77.535	0.542	0	440	0	440	0	440	440	0	0		1	0
2	283	2283	53	1	1	26.7299	0	0	0	0	0	0	0	0	0	1	1	0	1	1	0	1	0	0	1	2	0	1	1	0	1	139	31	79	92	76.2368	1.144	0	377	0	377	0	377	377	0	0		1.1	0
2	284	2284	65	1	1	22.8516	1	0	1	0	0	0	0	0	0	1	1	0	1	0	0	0	0	0	2	2	0	1	1	0	1	150	46	115	81	70.0738	0.727	0	383	0	383	0	383	383	0	0		1.1	0
2	285	2285	34	1	1	31.6158	1	1	1	0	0	0	0	0	0	1	0	0	1	1	0	1	0	0	2	1	1	0	1	0	0	159	31	252	78	111.044	1.383	0	361	0	361	0	361	361	0	0		0.9	0
2	286	2286	70	0	1	25.1039	0	0	1	0	0	0	0	0	0	1	1	0	1	0	0	1	0	0	2	1	1	1	1	0	1	190	62	119	104	64.9912	0.41	0	304	0	304	0	304	304	0	0		0.9	0
2	287	2287	71	1	1	25.8065	0	0	1	0	0	0	0	0	0	1	1	0	1	0	0	1	0	0	1	2	1	1	1	0	1	191	47	88	126	75.3867	2.002	0	506	0	506	0	506	506	0	0		1	0
2	289	2289	74	1	1	28.699	1	0	1	0	0	1	0	0	1	0	0	1	1	0	0	1	0	1	1	3	0	0	0	1	3	135	33	144	73	59.2124	3.548	0	378	0	378	0	378	378	0	0		1.2	1
2	290	2290	49	1	1	30.8642	0	0	1	0	0	0	0	1	0	1	1	0	1	1	0	1	0	0	2	1	1	1	1	0	1	136	26	210	68	49.846	2.313	0	484	0	484	0	484	484	0	0		1.6	0
2	292	2292	55	1	1	32.3265	0	0	0	0	0	0	0	0	0	1	1	0	1	0	0	1	0	0	1	1	1	1	1	0	1	163	40	222	79	84.3543	4.396	0	300	0	300	0	300	300	0	0		1	0
2	293	2293	47	1	1	31.1614	0	0	1	0	0	0	0	0	0	0	1	1	1	1	0	1	0	0	2	1	1	1	1	0	1	148	32	276	61	89.2304	3.171	0	300	0	300	0	300	300	0	0		1	0
2	294	2294	50	1	1	28.578	0	0	0	0	0	0	0	1	0	1	1	0	1	1	0	1	0	0	2	1	1	0	1	0	0	143	33	118	86	104.161	4.352	0	300	0	300	0	300	300	0	0		0.8	0
2	295	2295	64	1	1	26.1286	0	1	1	1	1	1	0	0	0	1	1	0	1	1	0	1	0	0	1	3	0	0	0	0	4	214	53	200	121	48.5016	9.672	0	290	0	290	0	290	290	0	0		1.5	0
2	296	2296	56	0	1	22.8516	0	0	1	0	0	0	0	0	0	1	1	0	1	1	0	1	0	0	2	2	1	1	1	0	1	132	33	82	83	45.9713	4.574	0	290	0	290	0	290	290	0	0		1.3	0
2	297	2297	63	1	1	26.8612	0	0	1	0	0	0	1	0	0	1	0	0	0	0	0	0	0	0	1	0	1	0	0	0	4	187	44	82	127	63.9692	0.992	0	322	0	322	0	322	322	0	0		1.2	0
2	298	2298	48	1	1	30.6939	0	0	0	0	0	1	0	0	1	1	0	0	1	1	0	0	0	0	1	0	1	0	0	1	3	170	44	184	89	64.5215	2.815	0	425	0	425	0	425	425	0	0		1.3	0
2	300	2300	39	1	1	29.0698	0	1	1	0	0	0	0	0	0	1	1	0	1	1	0	1	0	0	2	1	1	1	1	0	1	157	41	98	96	84.1153	1.121	0	329	0	329	0	329	329	0	0		1.1	0
2	301	2301	63	1	1	28.125	1	0	1	0	0	0	0	0	0	1	1	0	1	1	0	1	0	0	2	3	0	1	1	0	1	144	36	90	90	79.7445	4.12	0	216	0	216	0	216	216	0	0		1	0
2	302	2302	63	1	1	34.5405	1	0	1	0	0	0	0	0	0	1	1	0	1	0	0	0	0	1	1	1	1	1	1	0	1	118	32	56	75	79.7445	1.468	0	216	0	216	0	216	216	0	0		1	0
2	304	2304	56	1	1	48.4848	0	0	1	0	0	0	0	0	0	1	0	0	1	1	0	1	0	1	1	0	1	0	0	0	4	205	42	120	139	74.647	12.172	0	336	0	336	0	336	336	0	0		1.1	0
2	305	2305	47	1	1	29.0688	0	0	1	0	0	0	0	0	0	1	1	0	1	0	0	1	0	0	1	1	1	1	1	0	1	118	30	126	63	79.5187	0.684	0	211	0	211	0	211	211	0	0		1.1	0
2	306	2306	56	1	1	33.179	0	0	1	0	0	0	0	0	0	1	1	0	1	1	0	1	1	0	1	1	1	1	1	0	1	152	52	124	75	74.647	2.484	0	183	0	183	0	183	183	0	0		1.1	0
2	307	2307	56	1	1	28.9062	0	1	1	0	0	0	0	0	0	1	1	0	1	0	0	1	0	0	1	3	0	1	1	0	1	167	44	72	109	74.647	0.807	0	181	0	181	0	181	181	0	0		1.1	0
2	308	2308	51	1	1	30.4498	0	0	1	0	0	0	0	0	0	1	0	0	1	0	0	1	0	0	2	1	1	1	1	0	1	135	38	59	85	77.3154	53.058	0	183	0	183	0	183	183	0	0		1.1	0
2	309	2309	53	1	1	28.0497	1	1	0	0	0	0	0	0	0	1	0	0	1	0	0	1	0	0	1	1	1	1	1	0	1	146	40	106	85	76.2368	1.241	0	182	0	182	0	182	182	0	0		1.1	0
2	310	2310	75	1	1	25.7812	0	1	1	0	0	0	0	0	0	1	0	0	1	1	0	1	0	0	1	0	1	0	0	0	4	171	42	179	93	65.3203	1.238	0	182	0	182	0	182	182	0	0		1.1	0
2	311	2311	57	0	1	33.9493	1	0	1	0	0	0	0	0	0	1	0	0	1	1	0	1	0	0	1	1	1	1	1	0	1	121	33	143	59	55.8662	2.647	0	181	0	181	0	181	181	0	0		1.1	0
2	312	2312	74	0	1	26.1719	0	0	0	0	0	0	0	0	1	1	0	0	1	1	0	1	0	0	1	3	0	1	1	0	1	145	44	114	78	40.511	0.192	0	175	0	175	0	175	175	0	0		1.3	0
2	313	2313	65	0	1	24.6094	1	0	0	0	0	0	0	0	0	1	0	0	1	0	0	0	0	0	1	2	0	1	1	0	1	154	45	162	77	52.8133	1.901	0	175	0	175	0	175	175	0	0		1.1	0
2	314	2314	41	1	1	25.763	0	0	0	0	0	0	0	0	0	1	0	0	1	0	0	1	0	0	1	2	1	1	1	0	1	141	40	190	63	82.9419	0.291	0	171	0	171	0	171	171	0	0		1.1	0
2	315	2315	48	1	1	27.4406	0	0	1	0	0	0	0	0	0	1	0	0	1	0	0	0	0	0	1	1	0	0	0	0	4	131	60	52	61	71.0775	5.643	0	177	0	177	0	177	177	0	0		1.2	0
2	316	2316	76	1	1	25.6874	0	0	1	0	0	0	0	0	0	1	0	0	0	1	0	1	0	0	1	2	1	1	1	0	1	131	36	99	75	58.3863	2.985	0	227	0	227	0	227	227	0	0		1.2	0
2	317	2317	55	1	1	31.3146	0	0	1	0	0	0	0	0	0	1	0	0	1	0	1	1	0	0	2	1	0	0	0	0	4	156	33	150	93	61.4256	0.637	0	211	0	211	0	211	211	0	0		1.3	0
2	318	2318	59	1	1	27.3982	0	0	1	0	0	0	0	0	1	1	0	0	1	1	1	1	0	0	1	3	0	1	1	0	1	195	55	214	97	65.7921	1.4	0	218	0	218	0	218	218	0	0		1.2	0
2	319	2319	56	1	1	35.1562	1	0	1	0	0	0	0	0	0	1	1	0	1	1	0	1	0	0	1	0	1	0	0	0	4	112	29	86	66	95.143	1.669	0	167	0	167	0	167	167	0	0		0.9	0
2	320	2320	72	1	1	24.974	0	0	1	0	0	0	0	1	0	1	0	0	1	0	0	1	0	0	1	1	1	1	1	0	1	114	33	174	46	39.4123	2.473	0	177	0	177	0	177	177	0	0		1.7	0
3	100	3100	45	1	1	29.4107	0	0	0	0	0	0	0	0	0	1	1	0	1	0	0	1	0	0	1	2	1	0	1	0	0	128	34	123	69	102.786	0.428	0	694	0	694	0	694	694	0	0		0.9	0
3	101	3101	48	1	1	24.9135	1	0	0	0	0	0	0	0	0	1	1	0	1	1	0	1	0	0	2	2	1	1	1	0	1	156	33	119	99	88.6058	11.866	0	651	0	651	0	651	651	0	0		1	0
3	102	3102	73	1	1	23.7228	0	0	1	0	0	0	0	1	1	1	0	0	1	1	0	1	0	0	2	1	1	0	1	0	0	166	41	117	102	74.335	0.416	0	667	0	667	0	667	667	0	0		1	1
3	103	3103	78	0	1	26.7698	1	0	1	0	0	0	0	0	1	1	1	0	1	1	0	1	0	1	2	2	0	1	1	0	1	183	41	115	119	61.4396	0.345	0	623	0	623	0	623	623	0	0		0.9	1
3	105	3105	58	1	1	26.897	0	0	1	0	0	0	0	0	1	1	1	0	1	1	0	1	1	0	1	1	1	1	1	0	1	163	44	159	87	93.8157	1.965	0	663	0	663	0	663	663	0	0		0.9	1
3	106	3106	54	1	1	26.2596	0	0	1	0	0	0	0	0	1	1	1	0	1	0	1	1	0	0	2	1	1	1	1	0	1	180	70	63	97	75.7032	0.996	0	615	0	615	0	615	615	0	0		1.1	1
3	107	3107	52	1	1	29.0659	0	0	1	0	0	0	0	0	1	1	1	0	1	0	1	1	0	0	1	1	1	1	1	0	1	138	37	83	84	24.8111	0.487	0	654	0	654	0	654	654	0	0		2.8	1
3	108	3108	40	1	1	29.0548	0	0	0	0	0	0	0	0	1	1	1	0	1	0	0	1	0	0	1	2	1	1	1	0	1	150	35	213	72	106.461	0.295	0	900	0	900	0	900	900	0	0		0.9	1
3	109	3109	66	1	1	32.5964	1	0	1	0	0	0	0	1	1	1	0	0	1	1	0	0	0	1	2	1	1	0	1	0	0	140	39	100	81	78.0816	0.834	0	501	0	501	0	501	501	0	0		1	1
3	110	3110	59	0	1	27.3399	0	0	1	0	0	0	0	0	1	1	0	0	1	0	0	1	1	0	1	0	1	0	0	0	4	179	64	70	101	61.8147	0.58	0	501	0	501	0	501	501	0	0		1	1
3	111	3111	61	1	1	27.7323	0	0	1	0	0	0	0	0	1	1	0	0	1	0	1	1	0	0	2	1	1	0	1	0	0	148	36	185	75	64.8742	0.46	0	497	0	497	0	497	497	0	0		1.2	1
3	112	3112	60	1	1	26.3656	1	0	1	0	0	0	0	0	1	1	1	0	1	1	0	1	0	0	1	1	1	1	1	0	1	142	50	69	78	81.4429	0.531	0	483	0	483	0	483	483	0	0		1	1
3	113	3113	52	1	1	#NULL!	0	0	0	0	0	0	0	0	1	1	0	0	0	0	0	1	0	0	1	1	0	0	0	0	4	182	37	145	116	97.8543	1.295	0	497	0	497	0	497	497	0	0		0.9	1
3	114	3114	60	1	1	#NULL!	1	0	0	0	0	0	0	0	1	1	0	0	1	1	0	1	0	0	1	1	1	1	1	0	1	150	36	167	81	102.573	2.294	0	491	0	491	0	491	491	0	0		0.7	1
3	115	3115	40	1	0	34.2936	0	0	0	0	0	0	0	0	0	0	0	0	0	0	0	0	0	0	1	0	1	0	0	0	4	183	38	179	109	75.1862	4.088	0	444	0	444	0	444	444	0	0		1.2	0
3	116	3116	57	0	1	31.6406	0	0	0	0	0	0	0	0	0	1	0	0	0	0	0	1	0	0	2	0	1	0	0	0	4	175	56	78	103	82.1027	3.6	0	496	0	496	0	496	496	0	0		0.8	0
3	117	3117	59	1	1	21.6815	0	0	0	1	0	0	0	0	1	0	1	0	1	0	0	0	0	0	1	1	1	0	1	0	0	168	57	154	80	93.159	1.225	0	499	0	499	0	499	499	0	0		0.9	1
3	120	3120	51	0	1	40.5696	1	0	1	0	0	0	0	0	0	1	0	0	0	0	1	1	0	1	1	3	0	1	1	0	1	137	47	101	70	10.0677	8.643	0	249	0	249	0	249	249	0	0		4.7	0
3	121	3121	58	1	1	29.0698	0	0	0	0	0	0	0	0	0	1	1	0	1	0	0	1	0	0	2	1	1	1	1	0	1	154	43	78	95	73.6056	8.917	0	480	0	480	0	480	480	0	0		1.1	0
3	122	3122	63	1	1	26.398	0	0	0	0	0	1	0	0	0	1	0	0	1	0	0	0	0	0	1	3	0	0	0	1	3	129	38	108	69	79.7445	2.607	0	481	0	481	0	481	481	0	0		1	0
3	123	3123	63	1	1	25.2363	0	0	1	0	0	1	0	0	1	1	1	0	1	1	0	1	0	0	1	1	1	1	1	0	1	135	39	60	84	95.0704	19.455	0	480	0	480	0	480	480	0	0		0.8	1
3	124	3124	49	1	1	27.4691	1	1	1	0	0	0	0	0	0	1	0	0	0	0	1	1	0	0	1	0	1	0	0	0	4	140	31	150	79	99.9384	10.5	0	361	0	361	0	361	361	0	0		0.9	0
3	125	3125	76	1	1	27.4348	1	0	1	0	0	0	0	0	1	0	0	0	0	0	0	0	0	1	2	1	0	1	1	0	1	283	54	377	154	29.681	1.791	1	25	1	25	0	374	374	0	0		2.1	1
3	127	3127	75	0	1	22.806	0	0	1	0	1	1	0	0	1	1	0	0	1	1	0	1	0	0	2	3	0	0	0	1	3	132	40	145	63	44.3149	2.718	0	352	0	352	0	352	352	0	0		1.2	1
3	128	3128	45	1	1	33.218	0	0	1	0	0	0	0	0	1	1	0	0	1	0	1	1	0	0	1	1	0	0	0	0	4	166	43	133	96	90.4929	3.807	0	363	0	363	0	363	363	0	0		1	1
4	100	4100	79	1	1	31.7889	0	0	0	0	0	0	0	0	1	1	1	0	1	1	0	1	0	1	1	1	1	1	0	0	1	121	46	87	58	71.2671	2.673	0	1014	0	1014	0	1014	1014	0	0		1	1
4	101	4101	75	1	1	29.2187	1	0	1	0	0	0	0	0	1	1	1	0	1	0	1	1	0	1	1	1	1	1	1	0	1	141	45	70	82	65.3203	12.087	0	1266	0	1266	0	1266	1266	0	0		1.1	1
4	102	4102	52	1	1	30.6574	0	0	1	0	0	0	0	0	1	1	0	0	1	1	0	1	0	0	2	0	1	0	0	0	4	120	31	75	74	76.7742	1.908	0	902	0	902	0	902	902	0	0		1.1	1
4	104	4104	60	0	1	34.0895	0	0	1	0	0	0	0	0	1	1	1	0	1	1	0	1	0	0	1	2	1	1	1	0	1	288	80	207	167	80.3906	2.26	1	385	1	385	0	889	889	0	0		0.8	1
4	106	4106	78	1	1	35.629	0	0	1	0	0	0	1	0	1	1	0	1	0	1	0	1	0	0	1	1	1	0	1	0	0	191	45	269	92	71.7695	1.01	0	747	0	747	0	747	747	0	0		1	0
4	107	4107	81	0	1	27.7199	0	0	1	0	0	0	0	0	1	1	1	0	1	1	0	1	0	0	2	2	0	1	1	0	1	153	46	104	86	52.9633	1.313	0	232	0	232	0	232	232	0	0		1	1
4	108	4108	48	0	1	36.7105	1	0	1	0	0	0	0	0	1	1	1	0	1	1	0	1	0	1	1	1	1	1	1	0	1	118	31	125	62	75.8526	4.969	0	983	0	983	0	983	983	0	0		0.9	1
4	110	4110	57	1	1	23.9319	1	0	0	0	0	0	0	0	1	1	1	0	1	1	0	0	0	0	1	2	0	1	1	0	1	148	44	81	88	74.1245	0.83	0	1044	0	1044	0	1044	1044	0	0		1.1	1
4	112	4112	56	1	1	23.5938	0	0	0	0	0	0	0	0	0	0	1	0	1	1	0	0	0	0	1	0	1	0	0	0	4	176	56	106	99	99.8621	0.473	0	917	0	917	0	917	917	0	0		0.8	0
4	113	4113	78	0	1	25.8054	0	0	0	0	0	0	0	1	1	1	1	0	1	1	0	1	0	1	2	2	0	1	1	0	1	141	39	179	66	61.4396	1.229	0	899	0	899	0	899	899	0	0		0.9	1
4	114	4114	74	1	1	29.5457	0	0	1	0	1	0	0	0	1	1	0	1	0	1	0	1	0	1	2	1	0	0	1	0	0	160	32	159	96	49.1444	4.436	0	962	0	962	0	962	962	0	0		1.4	1
4	116	4116	49	1	0	22.243	0	1	1	0	0	0	0	0	1	1	1	0	1	1	0	0	0	0	1	1	1	1	1	0	1	94	26	124	43	99.9384	9.904	0	947	0	947	0	947	947	0	0		0.9	0
4	117	4117	56	0	1	25.7232	0	0	0	0	0	0	0	0	1	1	0	0	1	1	0	1	0	0	2	1	0	0	0	0	4	128	60	86	51	97.1674	2.497	0	1238	0	1238	0	1238	1238	0	0		0.7	1
4	118	4118	48	0	1	28.4298	0	0	0	0	0	0	0	0	1	1	0	0	1	1	0	0	0	0	1	0	0	1	0	0	4	166	66	57	89	108.131	1.647	0	1015	0	1015	0	1015	1015	0	0		0.6	1
4	119	4119	75	1	1	29.6963	0	0	1	0	0	1	1	0	0	1	1	0	1	1	0	1	1	1	1	2	0	0	0	0	4	147	38	192	71	44.895	1.199	0	848	0	848	0	848	848	0	0		1.5	0
4	120	4120	71	0	1	27.7344	1	0	1	0	0	1	0	0	1	0	0	0	1	0	0	0	1	1	1	3	0	1	1	0	1	157	43	65	101	50.6336	8.569	0	910	1	537	1	537	910	0	0		1.1	1
4	121	4121	65	1	1	29.654	0	0	1	0	0	0	0	0	1	1	0	0	1	1	0	1	0	0	1	2	1	0	1	0	0	102	33	71	55	93.7441	0.389	0	1103	0	1103	0	1103	1103	0	0		0.8	1
4	122	4122	72	0	1	40.1874	1	0	1	0	0	0	1	0	1	1	0	1	1	0	1	1	0	1	2	1	0	0	0	0	4	149	68	111	59	64.0845	9.496	1	458	1	458	0	1067	1067	0	0		0.9	1
4	123	4123	46	1	1	35.1393	1	0	0	0	0	0	0	0	1	1	0	0	1	1	0	0	0	1	2	1	1	0	1	0	0	156	34	122	98	107.129	10.917	0	1207	0	1207	0	1207	1207	0	0		0.8	1
4	124	4124	68	1	1	27.9657	0	0	0	0	0	0	0	0	0	0	1	0	1	1	0	1	1	0	2	2	0	0	1	0	0	142	37	127	80	56.0647	5.412	0	1013	0	1013	0	1013	1013	0	0		1.3	0
4	125	4125	43	1	1	27.716	0	0	0	0	0	0	0	0	1	1	1	0	1	1	0	1	0	0	1	2	0	0	0	0	4	159	59	99	80	91.7732	1.003	0	889	0	889	0	889	889	0	0		1	1
4	127	4127	73	1	1	26.6953	0	0	0	0	0	0	0	0	1	1	0	0	1	0	1	1	0	0	1	1	1	0	1	0	0	157	46	88	93	45.5302	19.86	0	1163	0	1163	0	1163	1163	0	0		1.5	1
4	128	4128	42	1	1	25.625	0	0	0	0	0	0	0	0	1	1	1	0	1	1	0	1	0	0	2	1	1	0	1	0	0	154	33	216	78	104.975	7.11	0	865	0	865	0	865	865	0	0		0.9	1
4	129	4129	40	1	1	29.9824	0	0	0	0	0	0	0	0	0	1	1	0	1	1	0	0	0	0	1	1	1	1	1	0	1	145	31	150	84	83.5265	2.75	0	1032	0	1032	0	1032	1032	0	0		1.1	0
4	130	4130	70	1	1	27.1879	0	0	1	0	0	0	0	0	1	0	0	1	1	1	0	1	0	0	2	1	1	0	1	0	0	134	30	58	92	50.5448	130.065	0	1166	0	1166	0	1166	1166	0	0		1.4	0
4	131	4131	42	1	1	27.4691	0	0	0	0	0	0	0	0	1	1	1	0	1	1	0	1	0	0	1	1	1	1	1	0	1	140	32	116	85	82.3613	2.58	0	776	0	776	0	776	776	0	0		1.1	0
4	132	4132	82	0	1	27.2793	0	0	0	0	0	0	0	1	0	1	1	0	1	1	0	1	0	1	2	1	1	1	0	0	1	129	53	64	63	52.5926	3.673	0	1121	0	1121	0	1121	1121	0	0		1	0
4	133	4133	47	1	1	33.5508	0	0	0	0	0	0	0	0	0	0	0	0	1	1	0	1	0	0	2	1	1	0	1	0	0	158	39	122	95	101.352	3.094	0	817	0	817	0	817	817	0	0		0.9	0
4	134	4134	46	1	0	33.1213	0	1	1	0	0	0	0	0	0	1	1	0	1	0	1	1	0	0	1	3	0	1	1	0	1	148	30	201	78	16.8141	1.274	1	44	1	44	0	663	663	0	0		4	0
4	135	4135	76	0	1	25.7571	0	0	1	0	0	0	0	0	0	1	0	0	1	1	0	1	0	0	1	0	1	0	0	0	4	228	64	129	138	62.3088	0.759	0	765	0	765	0	765	765	0	0		0.9	0
4	136	4136	58	1	1	29.4292	0	0	1	0	0	0	0	0	1	1	1	0	1	1	0	1	0	0	2	1	1	1	1	0	1	123	31	177	57	73.6056	3.195	0	949	0	949	0	949	949	0	0		1.1	1
4	137	4137	79	0	1	18.2262	1	0	1	1	0	0	0	0	1	1	0	0	1	0	0	0	1	0	1	2	0	0	0	0	4	109	46	53	52	53.7127	0.439	0	466	1	466	1	466	466	2	1	heart failure and intestinal obstruction and possible recurrences	1	1
4	138	4138	58	1	1	30.303	0	0	1	0	0	0	0	1	1	1	0	0	1	1	0	0	0	0	2	1	1	0	1	0	0	125	48	109	55	93.8157	0.455	0	752	0	752	0	752	752	0	0		0.9	1
4	139	4139	71	1	1	33.6853	0	0	1	0	0	0	0	0	1	1	1	0	1	0	1	0	0	1	1	1	1	1	1	0	1	111	42	86	52	75.3867	1.888	0	1106	0	1106	0	1106	1106	0	0		1	0
4	140	4140	40	1	1	37.4204	1	0	1	0	0	0	0	0	1	1	1	0	1	0	1	0	0	1	1	3	1	1	1	0	1	116	34	63	69	111.741	2.725	0	1059	0	1059	0	1059	1059	0	0		0.8	1
4	141	4141	65	0	1	26.4381	0	0	1	0	0	0	0	0	1	0	0	0	0	0	0	0	0	1	2	1	1	0	1	0	0	150	46	83	87	59.2635	3.087	0	682	0	682	0	682	682	0	0		1	1
4	142	4142	42	1	1	27.5433	0	0	0	0	0	0	0	1	1	1	0	0	1	1	0	1	0	0	2	1	1	0	1	0	0	244	47	107	176	92.4202	7.216	0	1265	0	1265	0	1265	1265	0	0		1	1
4	143	4143	61	1	1	28.7268	0	0	1	0	0	0	0	0	1	1	1	0	1	0	1	1	0	1	1	1	1	1	1	0	1	145	50	60	83	64.8742	0.489	0	1066	0	1066	0	1066	1066	0	0		1.2	1
4	144	4144	67	0	1	39.4667	0	0	1	0	0	0	1	0	1	1	0	0	1	1	1	1	0	1	1	1	0	0	0	0	4	181	54	90	109	76.5332	1.906	1	720	1	720	0	944	944	0	0		0.8	1
4	145	4145	63	0	1	33.0075	0	0	1	0	0	0	0	1	1	1	1	0	1	1	0	0	0	1	2	1	1	0	1	0	0	146	45	106	80	78.7142	1.917	0	827	0	827	0	827	827	0	0		0.8	1
4	146	4146	60	1	1	29.1839	1	1	1	1	0	0	0	0	1	1	1	0	1	1	0	1	0	1	1	1	1	1	1	0	1	181	44	271	83	81.4429	5.698	0	1009	0	1009	0	1009	1009	0	0		1	1
4	147	4147	52	1	0	27.9297	0	0	0	0	0	0	0	0	1	1	0	0	1	0	0	1	0	0	1	1	1	0	1	0	0	139	40	164	66	62.7338	1.336	0	708	0	708	0	708	708	0	0		1.3	1
4	148	4148	51	1	1	26.713	1	0	1	0	0	0	0	0	1	1	1	0	1	0	1	1	0	1	1	1	1	1	1	0	1	122	35	104	66	98.5441	0.401	0	820	0	820	0	820	820	0	0		0.9	1
4	150	4150	58	1	1	29.7781	1	0	1	0	0	0	0	0	1	1	0	0	1	0	1	0	0	1	1	1	1	0	1	0	0	122	28	134	67	82.5952	2.502	0	943	0	943	0	943	943	0	0		1	1
4	152	4152	68	1	1	28.7105	0	0	0	0	0	0	0	1	1	0	1	1	1	1	0	0	0	1	1	1	1	0	1	0	0	158	64	63	81	96.9675	2.68	0	1057	0	1057	0	1057	1057	0	0		0.7	1
4	153	4153	84	0	1	19.5312	1	0	1	0	0	0	0	0	1	1	0	0	1	1	0	1	0	0	1	2	0	0	1	0	0	126	42	113	61	67.9183	0.563	1	580	1	580	0	1014	1014	0	0		0.8	1
4	154	4154	80	1	1	29.8682	0	0	1	0	0	0	1	0	1	1	0	0	1	0	1	1	0	1	2	2	0	0	1	0	0	112	41	48	61	80.382	2.219	0	937	0	937	0	937	937	0	0		0.9	1
4	155	4155	71	0	1	31.2889	0	0	1	0	0	0	0	0	1	1	0	0	0	1	0	1	0	1	1	1	1	0	1	0	0	239	57	143	153	64.5362	5.2	1	974	1	974	0	1050	1050	0	0		0.9	1
4	156	4156	75	1	1	25.6747	0	0	1	0	0	0	0	0	1	1	1	0	1	1	0	1	0	0	2	1	1	1	1	0	1	158	43	77	100	58.7979	3.893	1	382	1	382	0	1121	1121	0	0		1.2	1
4	157	4157	59	1	1	28.5467	0	0	0	0	0	0	0	0	1	1	1	0	1	1	0	1	0	0	1	1	1	1	1	0	1	119	40	55	68	93.159	0.985	0	815	0	815	0	815	815	0	0		0.9	1
4	158	4158	78	1	1	26.8923	0	0	1	0	0	0	0	0	1	1	0	0	1	0	1	0	0	1	1	1	1	0	1	0	0	171	46	137	98	43.9588	5.764	0	963	0	963	0	963	963	0	0		1.5	1
4	159	4159	76	1	1	16.0637	0	0	1	0	0	0	0	0	1	1	0	0	1	0	1	0	0	1	1	1	1	0	1	0	0	87	32	69	41	64.8631	6.029	0	807	0	807	0	807	807	0	0		1.1	1
4	160	4160	51	1	1	32.3096	1	0	0	0	0	0	0	0	1	1	0	0	1	1	0	1	0	0	2	1	1	0	1	0	0	96	34	66	49	53.1393	5.303	0	628	0	628	0	628	628	0	0		1.5	1
4	161	4161	73	1	1	32.6172	0	0	0	0	0	0	0	0	1	1	0	0	1	1	0	1	0	0	2	1	1	0	1	0	0	151	54	76	82	66.2445	2.277	1	666	1	666	0	1003	1003	0	0		1.1	1
4	162	4162	57	1	1	37.1486	1	1	1	0	0	0	0	0	1	1	0	0	1	0	0	1	0	0	1	1	1	0	1	0	0	103	35	62	56	94.477	0.225	1	426	1	426	0	653	653	0	0		0.9	1
4	163	4163	70	0	1	31.3424	0	0	1	0	0	0	0	0	1	1	1	0	1	0	1	1	0	1	1	1	1	1	1	0	1	129	37	110	70	74.9372	0.42	0	671	0	671	0	671	671	0	0		0.8	1
4	164	4164	46	1	0	27.2509	0	0	0	0	0	0	0	0	0	1	0	0	1	1	0	0	0	0	2	0	1	0	0	0	4	206	50	56	145	102.067	0.266	0	669	0	669	0	669	669	0	0		0.9	0
4	165	4165	81	0	1	34.516	0	0	1	0	0	0	0	0	0	0	1	0	1	0	1	0	1	1	1	2	0	1	1	0	1	254	54	211	158	47.1988	1.012	0	932	0	932	0	932	932	0	0		1.1	0
4	166	4166	45	1	1	28.7356	0	0	0	0	0	0	0	0	1	1	1	0	1	1	0	1	0	0	2	1	0	1	1	0	1	122	33	95	70	80.6438	0.4	0	827	0	827	0	827	827	0	0		1.1	1
4	167	4167	72	1	1	23.4586	1	0	1	0	0	0	0	0	1	1	1	0	1	1	0	0	0	0	1	3	1	1	1	0	1	129	41	102	68	34.4533	2.548	0	659	0	659	0	659	659	0	0		1.9	1
4	168	4168	45	0	0	26.1066	0	0	0	0	0	0	0	0	1	1	1	0	1	0	0	1	0	0	1	1	1	0	1	0	2	140	48	78	76	104.973	1.254	0	484	0	484	0	484	484	0	0		0.7	1
4	169	4169	70	1	1	23.4602	0	0	1	0	0	0	0	0	1	1	1	0	1	1	0	0	0	0	1	1	1	1	1	0	1	283	69	139	186	90.5087	1.585	0	622	0	622	0	622	622	0	0		0.8	1
4	170	4170	80	1	1	29.683	0	0	1	0	1	0	0	0	1	0	1	0	1	0	1	0	0	1	1	1	1	0	1	0	0	82	34	87	31	70.7682	0.497	0	645	0	645	0	645	645	0	0		1	1
4	171	4171	51	1	1	27.3586	0	0	0	0	0	0	0	0	1	1	1	0	1	1	0	0	0	0	1	1	1	1	1	0	1	130	37	94	74	103.432	1.197	0	896	0	896	0	896	896	0	0		0.8	1
4	173	4173	80	0	1	29.1693	0	0	1	0	0	0	0	1	1	1	1	0	1	0	1	0	0	1	2	1	1	0	1	0	0	164	64	101	80	69.8538	2.654	0	782	0	782	0	782	782	0	0		0.8	0
4	174	4174	44	1	1	#NULL!	0	0	1	0	0	0	0	0	1	1	1	0	1	1	0	1	0	0	2	1	0	1	1	0	1	150	44	113	83	91.1308	0.707	0	492	0	492	0	492	492	0	0		1	1
4	175	4175	53	1	1	28.2776	1	0	1	0	0	0	0	0	1	1	1	0	1	0	1	1	0	1	2	2	0	1	1	0	1	179	37	254	91	85.5477	0.704	0	620	0	620	0	620	620	0	0		1	1
4	176	4176	76	1	1	#NULL!	0	0	1	0	0	1	0	0	0	1	0	0	1	0	1	0	0	1	1	2	1	0	0	1	3	149	56	61	81	64.8631	3.881	0	662	0	662	0	662	662	0	0		1.1	0
4	177	4177	58	0	1	25.5524	0	0	0	0	0	0	0	0	0	1	0	0	1	1	0	1	0	0	2	1	1	0	1	0	0	110	32	58	66	81.528	0.376	0	514	0	514	0	514	514	0	0		0.8	0
4	178	4178	80	1	1	24	0	0	1	0	0	0	0	0	1	1	1	0	1	1	0	1	0	0	2	2	0	1	1	0	1	109	41	54	57	80.382	0.609	0	589	0	589	0	589	589	0	0		0.9	1
4	179	4179	50	1	1	20.7285	0	0	0	0	0	0	0	1	1	1	1	0	1	1	0	1	0	0	2	2	1	1	1	0	1	120	31	149	59	104.161	1.025	0	741	0	741	0	741	741	0	0		0.8	1
4	180	4180	66	1	1	27.6635	0	0	1	0	0	0	0	1	1	1	1	0	1	0	1	1	0	0	2	1	1	0	1	0	0	128	44	59	72	69.5833	1.251	0	873	0	873	0	873	873	0	0		1.1	1
4	181	4181	82	0	1	42.1656	1	0	0	0	1	0	0	0	1	1	1	0	1	0	1	1	0	0	2	1	1	0	1	0	0	99	27	70	58	80.947	0.588	0	788	0	788	0	788	788	0	0		0.7	1
4	182	4182	71	0	1	32.4	0	0	1	0	0	0	0	0	1	1	1	0	1	1	0	0	0	0	1	1	1	1	1	0	1	185	59	142	98	74.4127	0.755	0	644	0	644	0	644	644	0	0		0.8	1
4	183	4183	44	0	1	35.8558	0	0	1	0	0	0	0	0	1	1	1	0	1	1	0	1	0	0	1	1	1	0	1	0	0	132	38	170	60	89.9533	3.734	0	900	0	900	0	900	900	0	0		0.8	1
4	184	4184	75	1	1	37.815	0	0	1	0	0	1	0	0	1	1	0	0	1	0	1	1	1	0	1	1	0	0	0	0	4	107	35	138	44	65.3203	4.123	1	328	1	328	0	561	561	0	0		1.1	1
4	185	4185	31	1	1	23.3564	0	0	0	0	0	0	0	0	1	1	1	0	1	1	0	1	0	0	2	1	1	0	1	0	0	142	75	57	56	80.0931	0.428	0	813	0	813	0	813	813	0	0		1.2	1
4	186	4186	52	1	1	24.3438	0	0	1	0	0	0	0	0	1	1	1	0	1	1	0	1	0	0	1	2	1	1	1	0	1	166	56	137	83	97.8543	4.993	0	903	0	903	0	903	903	0	0		0.9	1
4	187	4187	76	1	1	27.9662	0	0	1	0	1	1	1	0	1	1	0	0	1	0	1	0	0	1	1	3	1	0	0	1	3	197	40	117	134	82.6727	57.703	0	896	1	597	1	597	896	0	0		0.9	1
4	189	4189	50	1	1	25.6298	0	0	0	0	0	0	0	0	0	1	1	0	1	0	0	1	0	0	1	2	1	0	1	0	0	87	23	124	39	99.2388	2.821	1	412	1	412	0	587	587	0	0		0.9	0
4	191	4191	64	1	1	24.8061	0	0	1	0	0	0	0	0	1	1	1	0	1	1	0	1	0	0	2	1	1	0	1	0	0	129	40	150	59	89.9438	4.785	1	343	1	343	0	724	724	0	0		0.9	0
4	192	4192	65	0	1	27.4411	0	0	1	0	0	0	0	0	0	1	1	0	1	0	1	0	0	1	1	2	1	1	1	0	1	139	48	139	63	91.2145	1.15	0	586	0	586	0	586	586	0	0		0.7	0
4	193	4193	77	1	1	28.8835	0	0	1	0	0	0	0	0	1	1	1	0	1	1	0	0	0	0	1	1	1	0	1	0	0	192	76	97	97	86.1658	0.583	0	850	0	850	0	850	850	0	0		0.8	1
4	194	4194	60	1	1	32.8163	0	0	1	0	0	0	0	0	1	1	1	0	1	1	0	1	0	0	2	1	1	1	1	0	1	127	39	128	62	92.5069	0.593	0	510	0	510	0	510	510	0	0		0.9	1
4	195	4195	45	1	1	32.2066	1	0	0	0	0	0	0	0	1	1	1	0	1	1	0	1	0	0	2	2	1	1	1	0	1	128	53	45	66	93.2265	0.489	0	577	0	577	0	577	577	0	0		1.1	1
4	196	4196	79	1	1	26.6065	0	0	1	0	0	0	0	0	1	1	1	0	1	1	0	1	1	1	1	2	0	0	1	0	0	268	46	236	175	37.5212	2.219	0	659	0	659	0	659	659	0	0		1.7	1
4	197	4197	40	1	1	33.1429	0	0	1	0	0	0	0	0	0	1	1	0	1	1	0	1	0	0	2	1	1	0	1	0	0	188	39	311	87	93.7278	1.672	0	463	0	463	0	463	463	0	0		1	0
4	198	4198	73	1	1	31.4819	0	0	1	0	0	0	1	0	0	1	0	1	1	1	0	1	0	0	1	1	0	0	0	0	4	195	46	193	110	49.4908	0.388	0	819	0	819	0	819	819	0	0		1.4	0
4	199	4199	83	1	1	26.5582	0	0	1	0	0	0	0	1	0	1	1	0	1	1	0	1	0	1	1	3	0	1	1	0	1	157	42	82	99	78.7058	1.783	0	594	0	594	0	594	594	0	0		0.9	0
4	200	4200	40	1	1	32.4383	0	0	0	0	0	0	0	0	1	1	1	0	1	1	0	1	0	0	2	1	1	0	1	0	0	102	31	76	56	125.766	1.927	0	462	0	462	0	462	462	0	0		0.6	1
4	201	4201	52	0	0	30.0793	0	0	0	0	0	0	0	1	1	1	1	0	1	1	0	1	0	0	2	1	1	1	1	0	1	101	35	90	48	85.0376	1.033	0	748	0	748	0	748	748	0	0		0.8	1
4	202	4202	48	0	0	22.9398	0	0	0	0	0	0	0	0	0	1	1	0	1	0	0	1	0	0	1	1	1	0	1	0	0	129	43	196	47	87.4609	0.121	0	730	0	730	0	730	730	0	0		0.8	0
4	203	4203	73	1	1	27.5019	0	0	1	0	0	0	0	0	0	0	1	0	1	0	1	0	1	0	2	2	0	0	1	0	0	136	38	98	78	74.335	4.371	0	746	0	746	0	746	746	0	0		1	0
4	205	4205	71	0	1	21.665	0	0	1	0	0	0	0	0	0	0	1	0	1	1	0	1	0	0	2	1	1	0	1	0	0	123	33	115	67	32.1886	23.931	0	249	0	249	0	249	249	0	0		1.6	0
4	206	4206	62	1	1	29.4023	0	0	1	0	0	0	0	0	0	1	1	0	1	1	0	1	0	0	1	3	0	1	1	0	1	179	46	336	66	71.5662	0.274	0	470	0	470	0	470	470	0	0		1.1	0
4	207	4207	75	0	1	32.6984	0	0	0	0	0	0	0	0	1	1	1	0	1	1	0	1	0	0	1	1	1	1	1	0	1	136	53	70	69	72.3509	1.311	0	768	0	768	0	768	768	0	0		0.8	1
4	209	4209	69	0	1	24.9425	0	0	1	0	0	0	0	1	1	1	1	0	1	1	1	0	0	0	2	2	1	1	1	0	1	165	52	47	104	75.4655	2.071	0	648	0	648	0	648	648	0	0		0.8	1
4	211	4211	75	1	1	33.8883	1	0	1	0	0	1	0	0	1	1	1	0	1	0	1	1	0	1	1	2	0	0	0	1	3	127	26	149	71	65.3203	1.078	0	652	0	652	0	652	652	0	0		1.1	1
4	212	4212	81	1	1	21.1505	0	0	1	0	0	0	0	0	1	1	1	0	1	1	0	0	0	0	1	1	0	0	1	0	0	185	59	61	114	51.1717	1.024	0	561	0	561	0	561	561	0	0		1.3	1
4	213	4213	57	1	1	37.1114	0	0	1	0	0	0	0	0	1	1	1	0	1	0	1	0	0	0	2	1	1	0	1	0	0	181	36	292	87	83.1774	4.708	0	363	0	363	0	363	363	0	0		1	1
4	214	4214	80	1	1	#NULL!	1	0	1	0	0	0	0	1	0	1	1	0	0	1	0	1	0	1	2	3	0	1	1	0	1	110	29	119	57	80.382	1.69	0	400	0	400	0	400	400	0	0		0.9	0
4	215	4215	63	1	1	36.0331	1	0	1	0	0	0	0	0	0	1	1	0	1	1	0	1	0	1	1	2	0	0	1	0	0	138	36	145	73	100.434	2.436	0	407	0	407	0	407	407	0	0		0.7	0
4	216	4216	73	0	1	33.6925	0	0	1	0	0	0	0	0	1	1	1	0	1	0	1	0	1	0	1	0	1	0	0	0	4	134	36	93	79	63.6359	2.341	0	400	0	400	0	400	400	0	0		0.9	1
4	219	4219	57	1	1	21.499	0	0	0	0	0	0	0	0	0	1	1	0	1	1	0	0	1	0	1	1	1	0	1	0	0	146	56	95	71	99.1631	3.423	0	492	0	492	0	492	492	0	0		0.8	0
4	220	4220	75	1	1	30.9245	0	0	0	0	0	0	0	0	1	1	1	0	1	0	1	0	1	1	1	1	1	0	1	0	0	131	56	53	64	73.298	1.005	1	104	1	104	0	606	606	0	0		1	0
4	221	4221	60	1	1	28.4874	0	0	0	0	0	0	0	0	0	1	1	0	1	0	1	1	0	1	2	2	0	0	1	0	2	125	44	65	68	81.4429	1.268	0	415	0	415	0	415	415	0	0		1	0
4	222	4222	41	1	1	22.4197	0	0	0	0	0	0	0	1	0	1	1	0	1	1	0	1	0	0	2	1	1	1	1	0	1	97	29	112	46	93.0717	0.288	0	423	0	423	0	423	423	0	0		1	0
4	223	4223	82	0	1	24.1508	0	0	1	0	0	0	0	0	0	1	1	0	1	0	1	1	0	0	1	1	1	1	1	0	1	130	47	124	58	68.8793	0.829	1	523	1	523	0	523	523	0	0		0.8	0
4	224	4224	61	1	1	33.8281	1	0	1	0	0	0	0	0	1	1	1	0	1	1	0	1	0	0	1	1	1	1	1	0	1	162	36	153	95	80.8728	2.994	0	397	0	397	0	397	397	0	0		1	1
4	225	4225	79	1	1	28.7971	1	0	0	0	0	0	0	1	0	1	1	0	1	0	1	1	0	0	2	1	1	0	1	0	0	147	35	209	70	43.651	2.36	0	417	0	417	0	417	417	0	0		1.5	0
4	226	4226	64	1	0	28.1245	1	0	1	0	0	0	0	0	0	1	1	0	1	1	0	1	0	0	2	3	0	0	1	0	0	105	36	80	53	63.5214	0.555	0	394	0	394	0	394	394	0	0		1.2	0
4	227	4227	75	1	1	28.0402	0	0	1	0	0	0	0	0	0	1	1	0	1	0	1	1	0	0	1	1	1	1	1	0	1	122	31	106	70	73.298	12.757	0	598	0	598	0	598	598	0	0		1	0
4	228	4228	47	1	1	21.769	0	0	0	0	0	0	0	0	0	1	1	0	1	1	0	1	0	0	2	1	1	0	1	0	0	127	54	71	59	71.5785	0.335	0	657	0	657	0	657	657	0	0		1.2	0
4	230	4230	72	1	1	44.0252	1	0	1	0	0	1	1	0	0	1	1	1	1	0	1	1	1	0	1	1	1	1	1	0	1	129	34	217	52	39.4123	9.388	0	123	1	107	1	107	123	1	1	PROBABLY HEART FAILURE	1.7	0
4	232	4232	64	1	1	26.957	0	0	1	0	0	0	0	0	1	1	1	0	1	1	0	1	0	0	1	1	1	0	1	0	0	96	23	89	55	94.4049	7.599	0	312	0	312	0	312	312	0	0		0.8	1
4	233	4233	54	1	1	26.6016	0	0	1	0	0	0	0	0	1	1	1	0	1	1	0	1	0	0	1	1	1	1	1	0	1	103	42	74	46	101.275	0.186	0	832	0	832	0	832	832	0	0		0.8	1
4	235	4235	42	1	1	24.2901	0	0	1	0	0	0	0	0	0	1	1	0	1	0	1	0	0	1	1	0	1	0	1	0	4	166	56	131	84	92.4202	0.705	0	645	0	645	0	645	645	0	0		1	0
4	236	4236	83	1	1	25.9375	0	0	1	0	0	0	0	0	1	1	0	0	0	1	0	1	0	0	2	1	1	0	1	0	2	137	42	55	84	82.6096	3.452	0	600	0	600	0	600	600	0	0		0.8	1
4	237	4237	50	1	1	27.7887	0	0	1	0	0	0	0	0	0	1	1	0	0	1	0	1	0	0	2	1	1	0	1	0	0	120	39	96	62	77.8605	0.793	0	275	0	275	0	275	275	0	0		1.1	0
4	239	4239	74	0	1	24.5404	1	0	1	0	0	1	0	0	1	1	0	0	1	1	0	1	1	0	1	2	0	0	0	1	3	177	51	107	105	49.5777	4.288	0	229	0	229	0	229	229	0	0		1.1	1
4	240	4240	65	0	1	30.6315	0	0	1	0	0	0	0	0	1	1	1	0	1	1	0	1	0	0	2	1	1	0	1	0	2	200	59	87	124	91.2145	3.01	0	574	0	574	0	574	574	0	0		0.7	1
4	241	4241	45	1	1	28.9008	0	0	0	0	0	0	0	1	0	1	1	0	1	1	0	1	0	0	2	1	1	1	1	0	1	137	42	60	83	102.786	0.644	0	566	0	566	0	566	566	0	0		0.9	0
4	242	4242	42	1	0	22.1265	0	0	0	0	0	1	0	1	0	1	0	0	1	1	0	0	0	0	1	3	1	0	0	1	3	109	36	45	64	106.84	0.844	0	585	0	585	0	585	585	0	0		1	0
4	243	4243	67	1	1	22.5895	0	0	1	0	0	0	0	1	0	1	1	0	1	1	0	1	1	0	2	2	0	1	1	0	1	133	35	68	84	69.0962	0.164	0	194	0	194	0	194	194	0	0		1.1	0
4	244	4244	59	1	1	22.6582	0	0	1	0	0	0	0	0	1	1	1	0	1	1	0	1	0	0	2	2	1	1	1	0	1	110	42	67	55	73.0904	0.523	0	290	0	290	0	290	290	0	0		1.1	1
4	245	4245	42	0	1	57.3494	0	0	1	0	0	0	0	0	0	1	1	0	1	1	1	1	0	0	1	0	1	0	0	0	4	108	35	72	59	79.118	9.383	0	384	0	384	0	384	384	0	0		0.9	0
4	246	4246	57	1	1	30.4025	0	0	0	0	0	0	0	0	0	1	1	0	1	1	0	1	0	0	2	1	1	0	1	0	0	148	42	66	93	94.477	3.113	0	556	0	556	0	556	556	0	0		0.9	0
4	247	4247	81	1	1	24.1314	0	0	1	1	0	0	0	1	1	1	1	0	1	0	0	0	0	0	2	2	1	0	1	0	0	112	50	68	48	21.148	1.386	0	237	0	237	0	237	237	0	0		2.7	1
4	248	4248	48	1	1	30.9666	0	0	1	0	0	0	0	0	1	1	1	0	1	1	0	1	0	0	1	1	1	0	1	0	2	113	36	119	53	71.0775	0.344	0	258	0	258	0	258	258	0	0		1.2	1
4	250	4250	55	1	1	30.4471	1	1	1	0	0	0	0	0	0	1	1	0	1	0	1	1	0	1	1	1	0	1	1	0	1	161	47	104	93	67.667	1.605	0	261	0	261	0	261	261	0	0		1.2	0
4	251	4251	75	1	1	27.4901	0	0	0	0	0	0	0	0	1	1	1	1	1	1	0	1	0	0	1	1	1	1	1	0	1	171	42	137	102	65.3203	3.101	0	602	0	602	0	602	602	0	0		1.1	1
4	252	4252	58	1	1	26.7946	0	0	1	0	0	0	0	0	1	1	1	0	1	0	1	1	0	1	1	1	1	1	1	0	1	166	38	80	112	98.4689	2.601	1	279	1	279	0	518	518	0	0		0.8	1
4	253	4253	60	0	1	24.3333	0	0	1	0	0	0	0	0	0	1	1	0	1	1	0	1	0	0	2	1	1	1	1	0	1	173	64	80	93	80.3906	1.272	0	544	0	544	0	544	544	0	0		0.8	0
4	254	4254	64	1	1	29.274	0	0	1	0	0	0	0	0	0	0	0	0	1	1	0	0	0	0	2	1	1	1	1	0	1	125	58	82	51	79.1863	0.822	0	555	0	555	0	555	555	0	0		1	0
4	255	4255	63	0	1	31.0547	0	0	1	0	0	0	0	0	0	1	1	0	1	1	0	0	0	0	1	0	1	0	0	0	4	156	48	60	96	92.505	1.078	0	602	0	602	0	602	602	0	0		0.7	0
4	256	4256	81	0	1	29.368	1	0	1	0	0	1	0	0	1	1	0	0	1	1	0	1	0	1	1	3	1	0	0	1	3	183	53	232	84	42.4859	1.81	0	271	0	271	0	271	271	0	0		1.2	1
4	257	4257	52	1	1	28.5916	1	0	1	0	0	0	0	0	0	1	1	0	1	1	0	0	0	0	1	1	1	1	1	0	1	146	56	95	71	86.1508	1.7	0	567	0	567	0	567	567	0	0		1	0
4	258	4258	77	1	1	29.9359	1	0	1	0	1	1	0	0	1	1	0	0	1	1	0	0	0	0	1	3	0	0	0	1	3	99	31	62	56	57.9776	76.244	0	550	0	550	0	550	550	0	0		1.2	1
4	259	4259	72	1	1	27.4302	0	0	1	0	0	0	0	0	1	1	1	0	1	1	0	1	0	0	2	2	0	0	1	0	2	102	32	59	58	74.859	4.65	0	330	1	330	1	330	330	2	1	esophagus cancer	1	1
4	260	4260	78	1	1	25.6732	0	0	0	0	0	0	0	0	0	1	1	0	1	1	0	1	0	0	2	1	1	0	1	0	0	135	47	73	73	63.9582	53.002	0	336	0	336	0	336	336	0	0		1.1	0
4	261	4261	73	1	1	28.2822	0	0	1	0	0	0	1	0	0	1	1	0	1	1	0	0	0	0	2	1	1	0	1	0	0	120	43	102	57	59.6298	8.324	0	194	0	194	0	194	194	0	0		1.2	0
4	262	4262	62	1	1	32.3685	0	0	1	0	0	1	0	0	0	1	1	0	1	0	1	1	0	0	1	3	0	0	1	0	0	192	46	253	95	80.3067	1.532	0	585	0	585	0	585	585	0	0		1	0
4	263	4263	63	1	1	26.8923	0	0	0	0	0	0	0	0	0	1	1	0	1	1	0	1	0	0	2	1	1	0	1	0	2	145	48	80	81	71.0652	3.699	0	564	0	564	0	564	564	0	0		1.1	0
4	264	4264	68	1	1	29.0447	0	1	0	0	0	1	0	0	1	1	1	0	1	1	0	1	0	0	1	2	0	1	1	0	1	175	41	236	87	87.4517	16.316	0	572	0	572	0	572	572	0	0		0.9	1
4	265	4265	59	1	0	28.5061	1	0	1	0	0	0	0	1	0	1	1	0	1	1	0	0	0	0	2	1	1	1	1	0	1	145	48	83	80	65.7921	0.84	0	583	0	583	0	583	583	0	0		1.2	0
4	267	4267	75	0	1	38.8776	0	0	1	0	0	0	0	1	0	1	1	0	1	1	0	1	0	0	2	2	1	1	1	0	1	190	77	77	98	85.0269	0.516	0	370	0	370	0	370	370	0	0		0.7	0
4	268	4268	60	1	1	29.7607	0	0	1	0	0	0	0	0	0	1	1	0	1	0	0	1	0	0	2	1	1	0	1	0	0	132	38	61	82	97.0952	0.206	0	205	0	205	0	205	205	0	0		0.8	0
4	269	4269	48	1	1	23.8087	0	0	1	0	0	0	0	0	0	1	1	0	1	1	0	0	0	0	2	1	1	0	1	0	0	123	49	65	61	105.635	1.081	0	539	0	539	0	539	539	0	0		0.8	0
4	271	4271	55	1	1	27.4271	1	0	1	0	0	0	0	0	0	1	1	0	1	1	0	1	0	0	2	1	0	0	1	0	0	96	30	119	42	84.3543	0.508	0	302	0	302	0	302	302	0	0		1	0
4	272	4272	46	1	1	28.7756	0	0	1	0	0	0	0	0	0	1	0	0	1	1	0	0	0	0	1	1	1	1	1	0	1	148	42	178	70	72.0831	2.772	0	295	0	295	0	295	295	0	0		1.2	0
4	274	4274	79	0	1	29.604	0	0	1	0	0	0	0	0	0	1	1	0	1	0	1	1	0	0	2	1	1	0	1	0	2	210	59	114	128	53.7127	1.877	0	528	0	528	0	528	528	0	0		1	0
4	275	4275	62	1	1	31.6725	0	0	0	0	0	0	0	0	0	1	1	0	1	1	0	1	0	0	1	3	0	0	1	0	0	157	39	107	97	71.5662	76.784	0	277	0	277	0	277	277	0	0		1.1	0
4	276	4276	57	0	1	43.6016	0	0	1	0	0	0	0	0	0	1	1	0	1	1	0	1	0	1	1	2	1	1	1	0	1	256	82	143	145	96.4872	7.355	0	275	0	275	0	275	275	0	0		0.7	0
4	278	4278	51	1	1	25.3537	0	0	0	0	0	0	0	0	0	1	1	0	1	1	0	1	0	0	2	1	1	0	1	0	0	157	63	152	64	86.7581	9.703	0	268	0	268	0	268	268	0	0		1	0
4	279	4279	51	1	1	42.3399	1	0	1	0	0	0	0	0	0	1	1	0	1	1	0	1	1	0	1	1	1	1	1	0	1	157	38	247	70	86.7581	4.929	0	377	0	377	0	377	377	0	0		1	0
4	280	4280	53	1	1	30.6737	0	0	1	0	0	0	0	0	0	1	1	0	1	1	0	1	0	1	1	1	1	0	1	0	0	196	46	177	115	62.2947	3.175	0	226	0	226	0	226	226	0	0		1.3	0
4	282	4282	59	1	1	29.4029	1	0	1	0	0	0	0	0	0	1	1	0	1	1	0	1	0	1	1	0	1	0	0	0	4	124	30	233	47	73.0904	2.818	0	408	0	408	0	408	408	0	0		1.1	0
4	283	4283	53	0	1	25.2071	0	0	0	0	0	0	0	0	0	1	0	0	1	1	0	1	0	0	2	1	1	0	1	0	2	195	89	76	91	73.2347	0.3	0	183	0	183	0	183	183	0	0		0.9	0
4	284	4284	81	0	1	32.7155	0	0	1	0	1	0	0	1	0	1	1	0	1	1	0	1	0	1	2	1	1	1	1	0	1	150	71	53	68	42.4859	10.784	0	419	0	419	0	419	419	0	0		1.2	0
4	285	4285	82	1	1	34.6148	0	0	0	0	0	0	1	0	1	1	1	1	1	1	0	1	0	1	2	2	0	0	1	0	0	118	35	93	64	39.5326	3.593	0	279	1	148	1	148	279	0	0		1.6	1
4	291	4291	85	0	1	27.206	1	0	1	0	0	0	1	0	1	1	1	0	1	1	0	1	0	1	1	1	1	0	1	0	0	268	72	111	174	45.8911	0.861	0	310	0	310	0	310	310	0	0		1.1	1
4	292	4292	78	1	1	28.9341	0	0	1	0	0	0	0	0	1	1	1	0	1	1	0	1	0	1	1	1	1	1	1	0	1	120	52	88	50	57.5718	2.859	0	350	0	350	0	350	350	0	0		1.2	1
4	293	4293	74	1	1	27.5482	0	0	1	0	0	0	0	1	0	1	1	0	1	1	0	1	0	0	2	1	1	1	1	0	1	150	47	76	88	59.2124	3.717	0	345	0	345	0	345	345	0	0		1.2	0
4	294	4294	62	1	1	20.4498	1	0	1	0	0	0	0	0	1	1	1	0	1	1	0	1	0	0	2	2	0	1	1	0	1	96	40	77	41	91.2163	0.13	0	343	0	343	0	343	343	0	0		0.9	1
4	296	4296	67	1	1	30.1194	1	0	1	0	1	1	0	1	1	1	1	0	1	1	0	1	0	1	1	1	0	1	1	0	1	134	32	108	80	43.9255	1.013	0	366	0	366	0	366	366	0	0		1.6	1
4	297	4297	42	1	1	37.0038	1	1	0	0	0	0	0	0	0	1	1	0	1	1	0	1	0	0	2	1	1	1	1	0	1	170	37	130	107	116.398	6.059	0	345	0	345	0	345	345	0	0		0.7	0
4	298	4298	85	0	1	27.993	0	0	1	0	0	0	0	0	0	1	1	0	1	1	0	1	0	0	2	1	1	0	1	0	0	113	49	65	51	79.259	1.185	0	359	0	359	0	359	359	0	0		0.7	0
4	299	4299	63	1	1	26.8136	0	0	1	0	0	0	0	0	1	1	1	0	1	1	0	1	0	1	1	2	1	0	1	0	0	143	34	160	77	90.5778	1.419	0	331	0	331	0	331	331	0	0		0.9	1
4	300	4300	67	1	1	28.7197	0	0	1	0	0	0	0	0	0	1	1	0	1	0	1	1	0	1	1	2	0	1	1	0	1	129	46	147	54	51.6213	6.348	0	319	0	319	0	319	319	0	0		1.4	0
4	302	4302	61	1	1	24.3418	0	0	1	0	0	0	0	0	1	1	1	0	1	1	0	1	0	0	1	1	1	1	1	0	1	136	56	66	67	101.855	0.367	0	324	0	324	0	324	324	0	0		0.7	1
4	304	4304	52	0	1	27.3138	0	0	0	0	0	0	0	0	0	1	1	0	1	0	1	1	0	0	2	1	1	1	1	0	1	188	54	97	115	73.751	0.578	0	327	0	327	0	327	327	0	0		0.9	0
4	306	4306	72	1	1	29.5583	1	0	1	0	0	0	0	0	0	1	1	0	1	1	0	1	0	0	2	2	0	0	1	0	0	180	61	64	106	60.0501	0.355	1	156	1	156	0	282	282	0	0		1.2	0
4	307	4307	79	1	1	25.0657	0	0	1	0	0	0	0	1	0	1	1	0	1	1	0	1	1	1	1	2	0	1	1	0	1	110	43	41	59	29.062	6.004	0	287	0	287	0	287	287	0	0		2.1	0
4	312	4312	81	0	1	28.5156	0	0	1	0	0	0	0	1	0	1	0	1	1	1	0	0	0	0	2	0	1	0	0	0	4	110	46	69	50	81.5176	0.893	0	286	0	286	0	286	286	0	0		0.7	0
4	313	4313	48	0	1	23.1096	0	0	0	0	0	0	0	0	0	1	1	0	1	1	0	1	0	0	1	1	1	1	1	0	1	125	57	51	58	87.4609	0.179	0	290	0	290	0	290	290	0	0		0.8	0
4	315	4315	71	0	1	33.3095	0	0	1	0	0	0	0	0	0	1	1	0	1	0	0	1	0	0	2	1	1	1	1	0	1	113	40	59	61	56.8176	0.534	0	289	0	289	0	289	289	0	0		1	0
4	316	4316	55	1	1	25.6749	1	0	1	0	0	0	0	1	1	0	1	0	1	0	1	1	0	1	2	1	0	1	1	0	1	108	32	157	45	75.1732	1.02	0	286	0	286	0	286	286	0	0		1.1	1
4	317	4317	68	0	1	33.7945	0	1	1	0	0	0	0	0	0	1	0	0	1	1	0	1	0	1	2	1	0	0	0	0	4	191	47	196	105	58.0276	2.501	0	291	0	291	0	291	291	0	0		1	0
4	318	4318	49	1	1	28.9668	0	0	0	0	0	0	0	0	1	1	1	0	1	0	1	0	0	0	1	1	1	1	1	0	1	166	46	78	104	87.9856	4.781	0	290	0	290	0	290	290	0	0		1	1
4	319	4319	76	1	1	28.1969	0	0	1	0	0	0	0	1	1	1	1	0	1	1	0	1	0	1	2	1	1	1	1	0	1	115	28	79	71	38.3203	24.244	0	235	0	235	0	235	235	0	0		1.7	1
4	322	4322	52	1	1	29.2056	0	0	0	0	0	0	0	0	0	1	1	0	1	1	0	0	0	0	1	2	1	1	1	0	1	131	36	101	75	86.1508	1.051	0	247	0	247	0	247	247	0	0		1	0
4	323	4323	81	0	1	32	0	0	1	0	0	0	0	0	0	1	1	0	1	1	0	1	0	0	2	1	0	0	0	0	4	139	62	70	63	60.1584	2.314	0	244	0	244	0	244	244	0	0		0.9	0
4	324	4324	49	1	1	25.8541	0	0	0	0	0	0	0	0	1	1	1	0	1	1	0	1	0	0	2	2	0	0	1	0	0	240	46	325	129	99.9384	0.908	0	245	0	245	0	245	245	0	0		0.9	1
4	325	4325	50	0	1	22.6562	0	0	0	0	0	0	0	0	0	1	1	0	1	0	0	0	0	0	2	1	1	0	1	0	2	158	66	85	75	101.35	1.491	0	245	0	245	0	245	245	0	0		0.7	0
4	326	4326	64	1	1	25.0995	0	0	0	0	0	0	0	0	0	1	1	0	1	1	0	1	0	0	1	1	1	1	1	0	1	150	36	152	84	63.5214	0.5	0	249	0	249	0	249	249	0	0		1.2	0
4	328	4328	43	0	1	17.0646	0	0	0	0	0	0	0	0	0	1	0	0	0	1	0	1	0	0	1	0	1	0	0	0	4	194	86	51	98	90.5874	0.304	0	235	0	235	0	235	235	0	0		0.8	0
4	329	4329	62	1	1	26.9896	0	0	0	0	0	0	0	0	0	1	1	0	1	0	1	1	0	0	1	1	1	1	1	0	1	146	48	83	81	80.3067	0.381	0	236	0	236	0	236	236	0	0		1	0
4	330	4330	80	1	1	26.1207	0	0	1	0	1	0	0	0	1	1	1	0	1	1	0	1	0	0	1	2	0	1	1	0	1	99	39	58	48	80.382	0.274	0	236	0	236	0	236	236	0	0		0.9	0
4	331	4331	72	1	1	30.1856	0	0	0	0	0	0	0	0	0	1	1	0	1	1	0	0	0	0	1	2	1	1	1	0	1	123	40	109	61	85.0286	2.79	0	232	0	232	0	232	232	0	0		0.9	0
4	332	4332	83	0	1	28.1666	0	0	0	0	0	0	0	0	1	1	1	0	1	1	0	1	0	0	2	1	1	1	1	0	1	136	43	62	81	34.77	0.803	0	218	0	218	0	218	218	0	0		1.4	1
4	333	4333	54	0	1	27.5997	1	0	1	0	0	0	0	0	1	1	1	0	1	1	0	1	0	0	1	2	1	1	1	0	1	167	47	174	85	83.8513	5.811	0	205	0	205	0	205	205	0	0		0.8	1
4	335	4335	73	0	1	37.3166	0	0	1	0	0	0	0	0	1	1	1	0	1	1	0	1	0	1	1	1	1	1	1	0	1	141	56	71	71	73.3745	3.188	0	209	0	209	0	209	209	0	0		0.8	1
4	337	4337	54	1	1	29.313	0	0	0	0	0	0	0	0	1	1	1	0	1	1	0	1	0	0	1	1	1	1	1	0	1	121	38	114	60	84.9489	0.532	0	208	0	208	0	208	208	0	0		1	1
4	339	4339	65	1	1	26.0802	0	0	1	0	0	1	0	1	1	1	0	0	1	0	0	1	0	0	1	3	0	0	0	1	3	148	40	82	92	70.0738	3.053	0	196	0	196	0	196	196	0	0		1.1	1
4	342	4342	72	1	1	22.0522	0	0	1	0	0	0	0	0	0	1	1	0	1	1	0	1	0	0	1	1	1	1	1	0	1	129	64	85	48	66.7115	2.626	0	197	0	197	0	197	197	0	0		1.1	0
[truncated: 6 more columns]
